1 **Complement Decay-Accelerating Factor is a modulator of influenza A**  
2 **virus lung immunopathology**

3 Nuno Brito Santos<sup>1,6</sup>, Zoé Enderlin Vaz da Silva<sup>1,6</sup>, Catarina Gomes<sup>2,3</sup>, Celso A.  
4 Reis<sup>2,3,4,5</sup> and Maria João Amorim<sup>1,\*</sup>

5  
6 <sup>1</sup>Cell Biology of Viral Infection Lab, Instituto Gulbenkian de Ciência, Oeiras,  
7 Portugal

8 <sup>2</sup>Instituto de Investigação e Inovação em Saúde (i3S), University of Porto, 4200-  
9 135 Porto, Portugal

10 <sup>3</sup>Institute of Molecular Pathology and Immunology of the University of Porto  
11 (IPATIMUP), 4200-135 Porto, Portugal

12 <sup>4</sup>Molecular Biology Department, Institute of Biomedical Sciences of Abel Salazar  
13 (ICBAS), University of Porto, 4050-313 Porto, Portugal

14 <sup>5</sup>Pathology Department, Faculty of Medicine, University of Porto, 4200-319 Porto,  
15 Portugal

16 <sup>6</sup>These authors contributed equally

17 \*Corresponding author

18 Tel: + 351 214407905

19 Fax: + 351 214407970

20 Email [mjamorim@igc.gulbenkian.pt](mailto:mjamorim@igc.gulbenkian.pt)

21

22 Short Title: Decay-Accelerating Factor and influenza A virus immunopathology

23

24

## Abstract

25

26 Clearance of viral infections, such as SARS-CoV-2 and influenza A virus (IAV),  
27 must be fine-tuned to eliminate the pathogen without causing immunopathology. As such,  
28 an aggressive initial innate immune response favors the host in contrast to a detrimental  
29 prolonged inflammation. The complement pathway bridges innate and adaptive immune  
30 system and contributes to the response by directly clearing pathogens or infected cells, as  
31 well as recruiting proinflammatory immune cells and regulating inflammation. However, the  
32 impact of modulating complement activation in viral infections is still unclear. In this work,  
33 we targeted the complement decay-accelerating factor (DAF/CD55), a surface protein that  
34 protects cells from non-specific complement attack, and analyzed its role in IAV infections.  
35 We found that DAF modulates IAV infection *in vivo*, via an interplay with the antigenic viral  
36 proteins hemagglutinin (HA) and neuraminidase (NA), in a strain specific manner. Our  
37 results reveal that, contrary to what could be expected, DAF potentiates complement  
38 activation, increasing the recruitment of neutrophils, monocytes and T cells. We also show  
39 that viral NA acts on the heavily sialylated DAF and propose that it exacerbates  
40 complement activation, leading to lung immunopathology. Remarkably, this mechanism  
41 has no impact on viral loads but rather on the host resilience to infection and may have  
42 direct implications in zoonotic influenza transmissions.

43

44

## Author summary

45

46 Exacerbated complement activation and immune deregulation are at the basis of  
47 several pathologies induced by respiratory viruses. Here, we report that complement  
48 decay-accelerating factor (DAF), which inhibits complement activation in healthy cells,  
49 increases disease severity upon Influenza A virus (IAV) infection. Remarkably, DAF

50 interaction with IAV proteins, hemagglutinin (HA) and neuraminidase (NA), resulted in  
51 excessive complement activation and recruitment of innate and adaptive immune cells,  
52 without affecting viral loads. Furthermore, we observed that viral NA directly cleaves DAF  
53 and promotes complement activation, providing a possible link between IAV-DAF  
54 interaction and pathology. Therefore, our results unveil a novel pathway that could  
55 modulate disease severity, which may help to understand the increased pathogenicity of  
56 zoonotic and pandemic IAV infections.

57

58

59

## Introduction

60

61           Host-pathogen interactions are very complex with both parts contributing to the  
62 progression and outcome of infections. In the case of viruses, pathogen- and damage-  
63 associated molecular patterns (PAMP and DAMP, respectively) are detected by pattern  
64 recognition receptors (PRR) alerting the host of their presence, and triggering the immune  
65 response to clear the infection (1,2). It is generally accepted that for viral infections, an  
66 aggressive initial activation of innate immunity favors the host, whilst mechanisms that  
67 originate prolonged inflammation are associated with severe outcomes. This paradigm  
68 underpins for example the sex differences observed for coronavirus disease 19 (COVID-  
69 19), that results in lower death rate in women, despite similar incidence of infection in both  
70 sexes (3–5). However, an excessive immune response activation might destabilize the  
71 equilibrium needed to eliminate the pathogen without causing tissue damage, and lead to  
72 immunopathology (6,7). It is therefore important to determine the host factors and viral  
73 characteristics that result in an efficient immune response for clearing the pathogen  
74 without provoking immunopathology.

75           Influenza A virus (IAV) is the prevalent cause of seasonal flu, a relevant health  
76 problem as it kills up to 600,000 people worldwide yearly (8). IAV replication occurs in the  
77 upper and lower respiratory tract, peaks normally 2 days after infection, and in most cases  
78 little virus shed can be detected after 6 days. For the majority of people, symptoms (fever,  
79 cough, acute viral nasopharyngitis, headache) clear after 7-10 days, with fatigue enduring  
80 for weeks, without serious outcomes (8–10). In a proportion of people, however, severe  
81 complications occur, with the elderly, immunosuppressed, pregnant women, and people  
82 with associated comorbidities being at higher risk (11). IAV can also provoke pandemic  
83 outbreaks, associated with zoonotic events, which lead to significant higher mortality than  
84 seasonal epidemics. The 1918 Spanish influenza, for example, caused up to 50 million

85 deaths (12). Complications may include hemorrhagic bronchitis, pneumonia (primary viral  
86 or secondary bacterial), and death (13–16). They usually derive from an exacerbated  
87 immune response leading to tissue damage (17,18). Identifying intrinsic risk factors that  
88 contribute to severe disease outcomes may minimize immunopathology in the lungs and  
89 uncover new therapeutic targets with decreased proneness to develop resistance.

90 Defects in type I IFN response have been associated with the more severe cases  
91 of COVID-19 (19,20), suggesting that the initial steps in immune activation define disease  
92 outcome. However, there are other players involved in mounting immune responses, such  
93 as the complement system. The complement system has been extensively reviewed (21–  
94 23) and consists in a cascade of proteolytic interactions that lead to the direct killing of the  
95 pathogen or infected cell, as well as proinflammatory immune cell recruitment.  
96 Remarkably, C3 has been found within the mucus barrier (24), which elucidates  
97 complement role in early immune response upon pathogen infection in the airways.  
98 Disease severity and mortality have been associated with both lack or excess of  
99 complement activation in several viral infections such as Severe Acute Respiratory  
100 Syndrome Coronavirus (SARS-CoV) (25,26), Middle Eastern Respiratory Syndrome  
101 Coronavirus (MERS-CoV) (27), SARS-CoV-2 (28–30), and IAV (31–33). However, it is still  
102 unclear how fine-tuning complement activation may impact in the development of disease  
103 severity. One strategy to tune complement activation in infection is to target its regulators.  
104 Complement decay-accelerating factor (DAF/CD55) is a membrane-bound regulator of  
105 complement activation (RCA) exposed at the surface of most cell types, including human  
106 and murine airways (34–36). DAF promotes the decay of C3 convertases, thus protecting  
107 healthy cells from non-specific complement attack, and inhibiting the release of  
108 anaphylatoxins that would recruit and activate the immune response (37–39). In humans, it  
109 has been reported that DAF deficiency leads to excess complement activation with  
110 systemic implications (40,41). Furthermore, SNPs in DAF promoter region decreasing

111 protein expression have been associated with higher risk of severe infections by pandemic  
112 and avian IAV strains (42,43).

113 In this work, we explore the role of DAF in activating complement and in  
114 modulating IAV infection via an interplay with the antigenic viral proteins hemagglutinin  
115 (HA) and neuraminidase (NA). We observed that DAF, contrary to what could be  
116 expected, potentiates complement activation in IAV infection. We also describe that viral  
117 NA acts on DAF, in a strain-specific manner, removing  $\alpha$ -2,6-linked sialic acids and  
118 propose that this may influence pathogenicity. Given that the recognition of different  
119 conformations of sialic acid by the influenza virus is a key driver in influenza intra- and  
120 interspecies transmission, our findings may have implications for zoonotic events. Our  
121 results also showed that DAF leads to increased complement activation, as well as  
122 immune cell recruitment, especially of neutrophils and monocytes, increasing lung  
123 immunopathology without altering viral loads. Our work reveals a novel mechanism of  
124 virulence in IAV infection.

125

126

## Results

127

128       **Decay-accelerating factor (DAF) aggravates IAV infection by increasing**  
129 **immunopathology.**

130       Immune response to viral infections such as IAV must be tightly regulated in order to  
131 clear the pathogen without causing immunopathology. The complement system is at the  
132 frontline of the immune response, recognizing pathogens, and activating and recruiting  
133 immune cells. The absence of a regulator of this system, such as DAF, is expected to  
134 increase complement activation, resulting in more efficient viral clearance and/or increased  
135 tissue damage. To assess the consequences of DAF depletion in the context of IAV  
136 infection, C57BL/6J (WT) and C57BL/6J *Daf*<sup>-/-</sup> (*Daf*<sup>-/-</sup>) mice were challenged with two  
137 different H1N1 strains circulating in the human population: A/California/7/2009 (Cal) and  
138 A/England/195/2009 (Eng). For each viral strain, we measured bodyweight loss, as proxy  
139 for disease severity, and followed survival up to 11 days post infection (d.p.i.) (Fig. 1).  
140 Surprisingly, we observed that upon infection with Cal, *Daf*<sup>-/-</sup> mice exhibited reduced  
141 bodyweight loss starting at 4 d.p.i., when compared to the WT, and maintained that  
142 difference throughout the experiment (Fig. 1-A). In addition, percentage of survival of *Daf*<sup>-/-</sup>  
143 mice when infected with Cal was higher than of WT mice (75% vs. 25%) (Fig. 1-B).  
144 Similarly, upon challenge with Eng, *Daf*<sup>-/-</sup> mice had increased survival (50% vs. 25%), but  
145 lost more of their initial bodyweight when compared to the WT (Fig. 1-C, D). WT mice  
146 surviving to Eng infection had a milder bodyweight loss when compared to *Daf*<sup>-/-</sup> mice, thus  
147 explaining the reversion in trends later in infection, and the consequent discrepancy  
148 between bodyweight loss and survival. Taken together, our data indicate that DAF exerts a  
149 detrimental effect for the host during IAV infection.

150       We then extended the observation to two different well-characterized IAV strains: the  
151 mouse adapted virulent H1N1 A/Puerto Rico/8/1934 (PR8) and the less virulent H3N2 A/X-

152 31 (X31). X31 is a reassortant strain of PR8 containing segments 4 and 6 from A/Hong  
153 Kong/1/68 (HK68) (44) and for clarity purposes, the X31 strain will be mentioned as PR8-  
154 HK4,6 throughout this work. WT and *Daf*<sup>-/-</sup> mice were infected with sublethal and lethal  
155 doses of PR8 or PR8-HK4,6, and bodyweight loss and mortality assessed for 11 d.p.i..  
156 Upon infection with PR8, *Daf*<sup>-/-</sup> and WT mice presented similar bodyweight loss and all  
157 mice succumbed to the disease, *Daf*<sup>-/-</sup> mice at 7 d.p.i., and WT mice at 8 d.p.i. (Fig. 2-A,  
158 B). Upon infection with PR8-HK4,6, as observed in infections with the circulating strains,  
159 *Daf*<sup>-/-</sup> mice had a less severe disease and mortality when compared with their WT  
160 counterparts. These mice lost less of their initial bodyweight (-11.3% vs. -20.4%) and had  
161 reduced mortality than WT mice (50% vs. 100%) (Fig. 2-C, D). The discrepancy between  
162 PR8 and the other strains might be explained by the high virulence of this strain where 500  
163 PFU of PR8 are a lethal dose, here quantified by the humane endpoint of infection of a  
164 loss of more than 25% of initial bodyweight. These results show that DAF worsens disease  
165 outcome in infection with mildly virulent IAV strains, both circulating in the human  
166 population and lab-adapted but not with more virulent IAV strain.

167 As DAF is a complement regulator, the results indicate a role for complement in  
168 modulating disease outcome. To dissect between the role of the complement pathway and  
169 of this particular molecule, C57BL/6J mice depleted of CD59 (*Cd59*<sup>-/-</sup>), another regulator of  
170 complement activation (RCA), were infected with PR8-HK4,6, and bodyweight loss and  
171 mortality assessed for 11 d.p.i.. Interestingly, there was no difference in bodyweight loss  
172 and mortality between *Cd59*<sup>-/-</sup> mice and their WT counterparts, with all mice succumbing to  
173 the disease at 7 d.p.i. (Fig. 2-E, F). This indicates that the protection observed in *Daf*<sup>-/-</sup>  
174 mice is mediated by the absence of this particular RCA, and not due to a general  
175 complement deregulation.



176 Taken together, our results suggest a role for DAF in disease outcome. To further  
177 dissect the mechanisms behind such role, we focused on infections with PR8-HK4,6 as it  
178 is a well-described laboratorial model, with a virulence resembling circulating strains.

179 Protection conferred by DAF depletion could be explained by a decrease in viral  
180 burden or by preventing immunopathology (6). To distinguish between these two  
181 hypotheses, we started by assessing lung viral loads of WT and *Da<sup>f</sup><sup>-/-</sup>* mice infected with a  
182 sublethal dose of PR8-HK4,6. Samples were collected at day 3 and 6 p.i. to distinguish  
183 between early viral replication and clearance. At both time points, lung viral titers were  
184 identical in WT and *Da<sup>f</sup><sup>-/-</sup>* mice ( $3.8 \pm 2.8 \times 10^6$  PFU/g vs.  $3.1 \pm 2.7 \times 10^6$  PFU/g at 3 d.p.i.,  
185 and  $3.2 \pm 2.7 \times 10^5$  PFU/g vs.  $3.3 \pm 4.3 \times 10^5$  PFU/g at 6 d.p.i.) (Fig. 3-A, B). Thus, the  
186 amelioration of disease outcome is not associated with reduced viral replication nor faster  
187 clearance. We then interrogated if the difference observed between WT and *Da<sup>f</sup><sup>-/-</sup>* mice  
188 could be explained by a spatial difference in lung tissue infection, as was previously  
189 described for milder disease progression (45). To detect infected cells in specific parts of  
190 the lung tissue, we performed immunohistochemistry (IHC) staining of viral nucleoprotein  
191 (NP) in mice lung sections at 3 d.p.i., time corresponding to higher viral loads. A blind  
192 qualitative observation elucidated that in both WT and *Da<sup>f</sup><sup>-/-</sup>* mice, infection foci were  
193 mainly restricted to alveoli (Fig. 3-C), and quantification of infected bronchioli per lung  
194 section did not display relevant dissimilarities ( $27.8 \pm 12.7$  in WT and  $28.4 \pm 9.8$  in *Da<sup>f</sup><sup>-/-</sup>*) (Fig.  
195 3-D).

196 Lastly, to assess if protection of *Da<sup>f</sup><sup>-/-</sup>* mice was linked to a decrease in lung damage  
197 and immunopathology, a comprehensive and blind histological analysis of lung tissue was  
198 performed at day 3 and 6 p.i. (Table S1). At 3 d.p.i., *Da<sup>f</sup><sup>-/-</sup>* mice had a histological score of  
199  $4.0 \pm 1.3$ , whereas WT mice had a score of  $5.4 \pm 2.0$  (Fig. 3-E). At 6 d.p.i., this difference  
200 became significant, with *Da<sup>f</sup><sup>-/-</sup>* mice having a score of  $10.8 \pm 2.2$ , and WT of  $12.8 \pm 2.6$  (Fig.  
201 3-F). Therefore, IAV infected *Da<sup>f</sup><sup>-/-</sup>* mice have reduced lung damage at 6 d.p.i., when

202 compared to their WT counterparts, demonstrating that DAF increases tissue damage.  
203 These results show that DAF does not impact viral replication, clearance nor spatial  
204 distribution in the lungs, but point to a new role for DAF as an immunopathology instigator.

205

206 **DAF-induced immunopathology relies on elevated complement activation, immune**  
207 **cell recruitment and levels of IFN- $\gamma$ .**

208 We have shown that *Daf*<sup>-/-</sup> mice suffer less severe disease than WT mice upon IAV  
209 infection by decreasing tissue damage. Next, we aimed at dissecting the mechanism. DAF  
210 being an RCA, we first focused on determining the role of the complement pathway. For  
211 that purpose, C57BL/6J *C3*<sup>-/-</sup> (*C3*<sup>-/-</sup>) and C57BL/6J *C3*<sup>-/-</sup> / *Daf*<sup>-/-</sup> (*C3*<sup>-/-</sup> / *Daf*<sup>-/-</sup>) mice were  
212 infected with 500 PFU of PR8-HK4,6 and bodyweight loss monitored over the course of  
213 infection. As expected (46,47), *C3*<sup>-/-</sup> mice lost significantly more bodyweight than the WT,  
214 losing up to 20.8% of the initial bodyweight, when WT mice lost only 9.8%. *C3*<sup>-/-</sup> / *Daf*<sup>-/-</sup>  
215 mice, however, had a bodyweight loss comparable with *C3*<sup>-/-</sup> mice, losing up to 20.5% of  
216 the initial bodyweight (Fig. 4-A). These results show that the protection of *Daf*<sup>-/-</sup> mice is C3-  
217 dependent, and thus complement mediated.

218 DAF regulates complement activation by accelerating the decay of C3 convertases,  
219 reducing the levels of C3a. Hence, we proceeded by analyzing the levels of C3a in the  
220 bronchoalveolar lavages (BALs) of PR8-HK4,6 infected WT or *Daf*<sup>-/-</sup> mice. The main  
221 differences in tissue damage occurred at 6 d.p.i., and therefore we limited our analysis to  
222 that time point. Quite surprisingly, in PR8-HK4,6 infected *Daf*<sup>-/-</sup> mice the levels of C3a were  
223 of 439.8±474.6 ng/ml, and in WT mice of 1425.0±899.5 ng/ml (Fig. 4-B). Thus, IAV  
224 infection induced lower complement activation in *Daf*<sup>-/-</sup> mice than in WT mice, indicating  
225 that complement activation may play a role in increased tissue damage of WT mice. Taken  
226 together these results highlight the equilibrium needed to clear the disease without causing  
227 damage and the important role of complement in both these processes.

228           The complement pathway is a cascade of reactions that will release cytokines for  
229 recruitment and activation of the immune system, and culminating in the formation of a  
230 cytolytic pore (C5b-9). Our results showed that knocking out *Cd59*, inhibitor of C5b-9, does  
231 not impact disease outcome in the context of IAV infection (Fig. 2-E, F), suggesting that  
232 the protection observed in *Daf<sup>-/-</sup>* mice does not rely on complement-dependent cytotoxicity  
233 (CDC). To confirm this hypothesis, WT and *Daf<sup>-/-</sup>* murine primary lung cells were infected  
234 with PR8-HK4,6, treated with serum collected from naïve WT mice, and cell viability  
235 assessed as a measurement of CDC. *Daf<sup>-/-</sup>*-derived lung cells were more prone to CDC  
236 than WT-derived ones, both at steady state ( $57.7\pm 2.1\%$  vs.  $25.4\pm 1.5\%$ ) and upon PR8-  
237 HK4,6 infection ( $72.6\pm 2.3\%$  vs.  $38.5\pm 5.1\%$ ). This effect is specific of complement attack,  
238 as heat-inactivated serum did not increase cell death (Fig. 4-C), and confirms that *Daf<sup>-/-</sup>*  
239 mice protection is not dependent on complement cytolytic attack.

240           Given that *Daf<sup>-/-</sup>* mice have lower complement activation but that protection does  
241 not depend on CDC, it should rely on the release of anaphylatoxins leading to an alteration  
242 of immune cell recruitment and/or activation. To assess this, WT and *Daf<sup>-/-</sup>* mice were  
243 infected with 1000 PFU of PR8-HK4,6 and the recruitment of specific immune cell types  
244 measured in BALs. Analyses were carried at 3 and 6 d.p.i. in order to uncouple the first  
245 rapid response from a more mature later one. At 3 d.p.i. we observed that *Daf<sup>-/-</sup>* mice had  
246 similar numbers of natural killer (NK) cells and neutrophils recruited to the lungs, when  
247 compared to WT mice ( $84.4\pm 16.8\%$  vs.  $100\pm 71.0\%$  NK cells;  $79.7\pm 47.4\%$  vs.  $100\pm 59.3\%$   
248 neutrophils), but lower numbers of monocytes ( $66.3\pm 30.3\%$  vs.  $100\pm 25.6\%$ ) (Fig. 4-D-F).  
249 At 6 d.p.i., *Daf<sup>-/-</sup>* mice maintained the lower number of monocytes when compared to WT  
250 mice ( $58.1\pm 30.3\%$  vs.  $100\pm 35.8\%$ ), and also had reduced levels of neutrophils  
251 ( $69.1\pm 28.8\%$  vs.  $100\pm 27.5\%$ ) (Fig. 4-G, H). Levels of NK cells were not analyzed at this  
252 time point, nor in following analysis, as depletion of NK cells in PR8-HK4,6 infected WT  
253 mice did not alter disease outcome (Fig. S1-A, B). Additionally, we analyzed recruitment of

254 adaptive immune cells, namely CD4<sup>+</sup> and CD8<sup>+</sup> T cells that have been shown to play an  
255 important role in IAV infection (48). Interestingly, there was no difference in recruitment of  
256 both CD4<sup>+</sup> and CD8<sup>+</sup> T cells (Fig. 4-I, J), indicating that the protection observed in *Daf*<sup>-/-</sup>  
257 mice is likely dependent on lower immunopathology mediated by the innate immune  
258 response.

259 Cytokines are also key players in the recruitment and activation of the immune  
260 system. IFN- $\gamma$ , in particular, is an essential player in viral responses, and, like all members  
261 of the immune system, can cause tissue damage. Indeed, it has recently been shown that  
262 IFN- $\gamma$ , which is produced upon IAV infection, is detrimental to the host by suppressing the  
263 protective effect of group II innate lymphoid cells (ILC2) (49). Therefore, levels of IFN- $\gamma$   
264 were measured in BALs of PR8-HK4,6-infected WT and *Daf*<sup>-/-</sup> mice at 6 d.p.i.. *Daf*<sup>-/-</sup> mice  
265 had significantly lower levels of IFN- $\gamma$  than WT (22.9 $\pm$ 24.3 pg/mL vs. 44.4 $\pm$ 32.5 pg/mL)  
266 (Fig. 4-K), which is in accordance with the reduced IL6, immunopathology and tissue  
267 damage in this context.

268 Taken together, these results suggest that lower complement activation leads to a  
269 reduced immune response and recruitment of innate immune cells, such as neutrophils  
270 and monocytes. This will allow a reduction in tissue damage, ameliorating disease  
271 outcome. Interestingly, and counter-intuitively, the decrease in complement activation is a  
272 consequence of the absence of a major complement regulator, DAF.

273

#### 274 **DAF-induced immunopathology depends on viral HA and NA.**

275 We observed that lack of DAF protected mice from infection with PR8-HK4,6, but  
276 not with PR8 (Fig. 2-A-D). These strains differ only in haemagglutinin (HA) and  
277 neuraminidase (NA) (44). To investigate the individual role of these proteins in the  
278 resilience to infection, we constructed chimeric viruses in PR8 background containing  
279 either HA (PR8-HK4) or NA (PR8-HK6) from HK68. It is important to note that analyses

280 are performed in comparison with PR8-HK4,6 infections and not PR8. Therefore, it is the  
281 removal of HK6 in PR8-HK4 that will allow investigating the contributions of different NAs,  
282 and the removal of HK4 in PR8-HK6 that will enable assessment of the contributions of  
283 HAs.

284 On a first step, *Daf*<sup>-/-</sup> and WT mice were infected with PR8-HK6, hence highlighting  
285 the role of HA. Infection with a sublethal dose of PR8-HK6 resulted in a modest  
286 amelioration of bodyweight loss in *Daf*<sup>-/-</sup> mice, reaching -16.8% of the initial bodyweight,  
287 when compared to WT mice that lost up to 20.1% of the initial bodyweight (Fig. 5-A). When  
288 infected with lethal doses of this strain, both *Daf*<sup>-/-</sup> and WT mice had a mortality of 100%  
289 (Fig. 5-B). *In vitro* and *ex vivo* experiments had shown that this strain had increased  
290 replication levels when compared to PR8, PR8-HK4,6 or PR8-HK4 (Fig. S2-A-E).  
291 Therefore, we hypothesized that the increased mortality of *Daf*<sup>-/-</sup> mice, when compared to  
292 infection with the other strains, could be due to increased viral titers. Interestingly, analysis  
293 of lung viral loads showed no difference between *Daf*<sup>-/-</sup> and WT mice both at 3 and 6 d.p.i.  
294 (Fig. 5-C, D) and titers were not higher than those observed for the infection with PR8-  
295 HK4,6 (Fig. 3-A, B). Therefore, HA-DAF interaction modulates virulence, without impacting  
296 in viral replication or clearance *in vivo*.

297 As HA is involved in adhesion of viral particles to host cells, we asked if differences  
298 in HA would impact tissue penetration. As observed in PR8-HK4,6 infected mice, IHC of  
299 NP and quantification of infected bronchioli showed no difference in infection levels and  
300 patterns between *Daf*<sup>-/-</sup> and WT mice (Fig. 5-E, F), indicating that HA-DAF interaction has  
301 no role in this context. Additionally, analysis of tissue damage showed that histological  
302 scores between *Daf*<sup>-/-</sup> and WT mice were similar at 3 d.p.i. (4.7±3.5 vs. 4.1±2.8) (Fig. 5-G),  
303 but significantly reduced in *Daf*<sup>-/-</sup> mice when compared to WT at 6 d.p.i. (7.4±3.7 vs.  
304 10.9±2.8) (Fig. 5-H). These results show that HA-DAF interaction contributes to disease  
305 severity and worse disease outcome observed in WT mice, but does not impact lung

306 tissue damage and hence does not completely explain the protective effect of DAF  
307 absence.

308 To better understand the role of HA-DAF interaction in disease outcome, we  
309 analyzed complement and immune cell recruitment in the lungs of PR8-HK6 infected mice.  
310 Interestingly *C3<sup>-/-</sup>* and *C3<sup>-/-</sup> / Daf<sup>-/-</sup>* mice had similar bodyweight loss when infected with  
311 PR8-HK6 (Fig. 6-A), and the levels of C3a were reduced in BALs of *Daf<sup>-/-</sup>* mice when  
312 compared to their WT counterparts (178.4±36.8ng/mL vs. 405.8±99.2ng/mL) (Fig. 6-B).  
313 These observations correspond to what was seen in PR8-HK4,6 infection and indicate that  
314 different HA-DAF interactions do not elicit different complement responses.

315 Analysis of lung immune cell recruitment in PR8-HK6 infected mice showed that at 3  
316 d.p.i. levels of neutrophils and monocytes were identical between *Daf<sup>-/-</sup>* and WT mice (Fig.  
317 6-C, D). At 6 d.p.i, however, *Daf<sup>-/-</sup>* mice had lower numbers of neutrophils and monocytes  
318 when compared to their WT counterparts (58.6±21.3% vs. 100±36.41% neutrophils;  
319 61.4±19.6% vs. 100±41.45% monocytes) (Fig. 6-E, F) showing that a change in HA does  
320 not alter the innate immune cell recruitment observed in PR8-HK4,6. Of note, the levels of  
321 CD4<sup>+</sup> and CD8<sup>+</sup> T cells were decreased in PR8-HK6 infected *Daf<sup>-/-</sup>* mice when compared  
322 to their WT counterparts (57.5±26.2% vs. 100±35.9% CD4<sup>+</sup> T cells and 49.3±36.7% vs.  
323 100±50.5% CD8<sup>+</sup> T cells) (Fig. 6-G, H), contrarily to what was seen in PR8-HK4,6 infection  
324 (Fig. 4-I, J) and showing that HA-DAF interaction modulates the adaptive immune  
325 response.

326 Taken together, our data is consistent with the HA-DAF interaction controlling  
327 disease severity, without impacting complement or innate immune responses leading to  
328 immunopathology. It does, however, impact the recruitment of T cells. The decreased  
329 activation of the adaptive immune response, together with the higher virulence of this  
330 strain may exceed the beneficial effect of reduced tissue damage and explain the similar  
331 mortality in *Daf<sup>-/-</sup>* and WT mice.

332 As HA-DAF interaction did not impact complement nor innate immune responses, we  
333 proceeded with analysis of NA-DAF interactions. Following the principle stated above,  
334 analyses were done in comparison with PR8-HK4,6 and not PR8 and thus the removal of  
335 HK6 from PR8-HK4,6 allowed assessing the role of different NAs. Therefore, to  
336 understand the contribution of NA in the protection conferred by DAF depletion, *Daf*<sup>-/-</sup> and  
337 WT mice were infected with sublethal and lethal doses of PR8-HK4. Upon infection with  
338 this strain, *Daf*<sup>-/-</sup> mice showed a reduced bodyweight loss when compared to the WT mice  
339 (17.7% vs. 21.8% maximum bodyweight loss) (Fig. 7-A). The detrimental effect of DAF  
340 was more evident when mice were challenged with lethal doses. Indeed, 87.5% of WT  
341 mice succumbed to infection with 250 PFU of PR8-HK4, whereas all of *Daf*<sup>-/-</sup> mice survived  
342 (Fig. 7-B). As these results correspond to what was observed with PR8-HK4,6, NA-DAF  
343 interaction does not directly impact disease severity.

344 Similarly, lung viral loads were identical in *Daf*<sup>-/-</sup> and WT mice infected with PR8-HK4 both  
345 at 3 ( $2.2 \pm 1.9 \times 10^6$  PFU/g vs.  $4.1 \pm 5.5 \times 10^6$  PFU/g) and 6 d.p.i. ( $8.8 \pm 9.9 \times 10^4$  vs.  
346  $6.1 \pm 4.1 \times 10^4$  PFU/g). Also, PR8-HK4 infection foci were mainly restricted to the alveoli  
347 with no difference at the level of infected bronchioli in *Daf*<sup>-/-</sup> and WT mice lung sections  
348 ( $25.8 \pm 8.3\%$  vs.  $24.2 \pm 13.6\%$ ) (Fig. 7-E, F). These results show that NA-DAF interaction  
349 does not impact viral replication, clearance or tissue penetration. Interestingly, further  
350 analysis of PR8-HK4 infected lungs showed that the lungs of *Daf*<sup>-/-</sup> mice were more  
351 damaged at 3 d.p.i. with a histological score of  $4.3 \pm 0.9$ , when compared to lungs from WT  
352 mice that had a score of  $2.9 \pm 1.5$ . At 6 d.p.i. this difference was no longer present, *Daf*<sup>-/-</sup>  
353 lungs having a score of  $8.3 \pm 3.8$ , and WT of  $9.2 \pm 3.1$ . Hence PR8-HK4 infected *Daf*<sup>-/-</sup> mice  
354 have more lung tissue damage at an early time point in infection, when compared to WT  
355 mice, and oppositely to what was observed in PR8-HK4,6 infection. NA-DAF interaction  
356 would then control lung immunopathology in this context, but with no real consequence in

357 disease outcome, as *Daf<sup>-/-</sup>* still had decreased bodyweight loss and mortality when  
358 compared to the WT.

359 To better understand the mechanism behind this observation, we started by  
360 assessing the role of complement. *C3<sup>-/-</sup> / Daf<sup>-/-</sup>* and *C3<sup>-/-</sup>* mice had a similar bodyweight loss  
361 upon PR8-HK4 infection (Fig. 8-A), and *Daf<sup>-/-</sup>* mice had significantly lower levels of C3a  
362 detected in BALs at 6 d.p.i. when compared to their WT counterparts (194.4±115.6 ng/mL  
363 vs. 506.4±180.2 ng/mL) (Fig. 8-B). These results confirm that, similarly to what was  
364 observed in PR8-HK4,6 and PR8-HK6 infections, the protection of *Daf<sup>-/-</sup>* mice upon PR8-  
365 HK4 infection is complement mediated, and *Daf<sup>-/-</sup>* mice might be protected via lower levels  
366 of complement activation.

367 We then proceeded with analysis of immune cell recruitment to the lungs at 3 and 6  
368 d.p.i.. At 3 d.p.i., *Daf<sup>-/-</sup>* mice had reduced levels of neutrophils but not monocytes when  
369 compared to their WT counterparts (16.2±8.6% vs. 100±112.1% neutrophils; 38.1±21.1%  
370 vs. 100±79.5% monocytes) (Fig. 8-C, D). Then, at 6 d.p.i., *Daf<sup>-/-</sup>* and WT mice had  
371 comparable levels of both neutrophils and monocytes, and CD4<sup>+</sup> and CD8<sup>+</sup> T cells (Fig. 8-  
372 E-J) (105.0±62.9% vs. 100±49.2% neutrophils; 104.5±54.0% vs. 100±49.1% monocytes;  
373 106±67.0% vs. 100±61.7% CD4<sup>+</sup> T cells; 104.3±60.6% vs. 100±52.6% CD8<sup>+</sup> T cells).  
374 These results do not correspond to what was observed in infections with PR8-HK4,6,  
375 where the main differences between *Daf<sup>-/-</sup>* and WT mice resided in reduced numbers of  
376 monocytes at 3 d.p.i., and reduced numbers of both neutrophils and monocytes at 6 d.p.i.  
377 (Fig. 4-E-H). We can therefore conclude that different NA elicit different innate immune  
378 responses, and that NA-DAF interaction is responsible for the recruitment of innate  
379 immune cells.

380 In summary, *Daf<sup>-/-</sup>* mice are protected from PR8-HK4 infection with decreased  
381 complement levels and reduced neutrophil recruitment but increased immunopathology  
382 early in infection. At later time points we did not observe differences between WT and *Daf*



383 <sup>h</sup> mice regarding both lung tissue damage and immune cell recruitment. The reduction in  
384 neutrophil recruitment reflects what was observed in PR8-HK4,6 infection, albeit at an  
385 earlier time point. One might then suggest that NA-DAF interaction is important in  
386 regulation of neutrophil recruitment, and that these cells play an important role in  
387 modulating disease outcome. Taken together, our results demonstrate that both HA and  
388 NA play a role in disease severity, and that the cumulative effect of both HA- and NA-DAF  
389 interactions results in the mechanism worsening the outcome observed upon Cal, Eng and  
390 PR8-HK4,6 infections.

391

### 392 **Influenza A virus NA cleaves DAF through its sialidase activity**

393 NA is an widely studied sialidase with described roles in mucus penetration, cell egress  
394 and recently even in viral entry (50). Remarkably, NA has also been reported to cleave  
395 sialic acid residues from exogenous proteins inside the cell (51). As DAF is a highly  
396 sialylated protein, we hypothesized that the interaction between DAF and NA resided in  
397 the ability of NA to cleave DAF's sialic acid content. Sialic acids that reside on cell surface  
398 glycoproteins and glycolipids are the receptors for IAV, recognized by HA for viral entry  
399 and cleaved by NA for viral exit (52). In order to assess cleavage of DAF's sialic acid  
400 content, we infected a human alveolar cell line (A549) with Cal, Eng, PR8 and PR8-HK4,6,  
401 and analyzed DAF content by western blot. We observed that in infected cells the band  
402 marked by the anti-DAF antibody was at a lower molecular weight (MW) than in mock-  
403 infected cells (Fig. 9-A). This difference in MW is of nearly 18 kDa, which corresponds to  
404 DAF sialic acid content (53) and suggests that infection leads to loss of said content.  
405 Quantification of this cleavage confirmed that it is dependent on infection and progressive  
406 over time. Interestingly, the extent of DAF cleavage is not identical in cells infected with  
407 different IAV strains, PR8 infected cells presenting the most drastic effect (Fig. 9-B).

408 Protein glycosylation type and levels may greatly vary between organisms (54). As  
409 previous results were obtained using human cell lines, we wanted to confirm that infection  
410 with the tested strains would remove the sialic acid content of murine DAF. For that  
411 purpose, we collected mouse embryonic fibroblasts (MEF) from WT mice and infected  
412 them with the laboratory adapted strains PR8 and PR8-HK4,6. Similarly to what was  
413 shown in a human cell line infection, murine DAF in infected MEFs suffered a drop in MW,  
414 when compared to non-infected cells (Fig. 9-C). Moreover, the differences in cleavage  
415 efficacy between PR8 and PR8-HK4,6 were maintained (Fig. 9-D), showing that IAV is  
416 able to process murine DAF and giving an insight to what may be triggering complement  
417 activation *in vivo*.

418 To show that NA mediates processing of DAF and discard the involvement of other viral  
419 proteins, we transfected HEK293T cells with eight different plasmids, each encoding a  
420 different PR8 genomic segment. As expected, cleavage only occurred when cells were  
421 transfected with segment 6, which encodes for NA, showing that NA is the only viral  
422 protein responsible for the reduction in DAF MW (Fig. 9-E). To confirm that this drop in  
423 MW was indeed the result of direct enzymatic activity of NA, we introduced the mutation  
424 E229A in PR8 segment 6, which pronouncedly decreases NA enzymatic activity, while still  
425 sustaining a low level of viral replication (55). Using the RG technique as mentioned  
426 above, we created a PR8 strain containing the mutated NA: PR8 NA-E229A. Analysis of  
427 DAF in cells transfected with the eight RG plasmids required for producing the passage 0  
428 virus showed that, by impairing NA sialidase activity, DAF cleavage was prevented (Fig. 9-  
429 H). Taken together, these results confirm that DAF cleavage observed upon infection is  
430 due solely to NA sialidase activity.

431 As NA is a transmembrane protein with potential to cleave sialic acids at the cell surface,  
432 but also in the cytoplasm while en route to the plasma membrane, we questioned where  
433 DAF cleavage was taking place. For that, PR8 infected A549 cells were treated with a non-

434 permeable NA inhibitor, Zanamivir. We observed that Zanamivir treatment reduced the  
435 proportion of cleaved DAF (0.60 vs. 0.75), showing that DAF cleavage happens in part at  
436 the cell membrane, and in part in the cytoplasm (Fig. 9-F, G).

437 NA unprecedented direct and pronounced effect on DAF strongly suggests a functional  
438 consequence. It has been proposed that DAF negatively charged sialic acids function as a  
439 spacer, which projects DAF RCA domains to the extracellular milieu (56). Additionally,  
440 sialic acid removal promotes DAF to be proteolytically shed (35). Therefore, we  
441 hypothesized that NA-mediated sialic acid cleavage would result in DAF loss/alteration of  
442 function, resulting in increased complement activity. To test this, we produced lentiviral  
443 vectors to deliver WT or E229A versions of PR8 NA fused to GFP. After transduction of  
444 A549 cells, we treated cells with normal human serum and stained for C5b-9 as a proxy for  
445 complement activation. Transduction of cells with WT NA resulted in increased C5b-9  
446 deposition when compared with cells transduced with E229A ( $1\pm 0.7$  vs.  $0.3\pm 0.2$ ) (Fig. 9-I).  
447 Therefore, NA removal of DAF sialic acid content does impair its complement regulator  
448 function, increasing complement activation.

449 For IAV receptor recognition, the binding of sialic acid to the penultimate galactose  
450 residues of carbohydrate side chains is important, and different IAVs exhibit preference for  
451 Neu5Ac  $\alpha(2,3)$ -Gal (hereafter  $\alpha 2,3$ -) or Neu5Ac  $\alpha(2,6)$ -Gal (hereafter  $\alpha 2,6$ -) conformations  
452 (57,58). Interestingly, most avian IAVs bind preferentially to sialic acid joined to the sugar  
453 chain through an  $\alpha 2,3$ -linkage, whereas human IAV preferentially use  $\alpha 2,6$ -linked sialic  
454 acid as a cellular receptor (58,59). To assess which type of ligations were cleaved by NA,  
455 we infected A549 cells with PR8 and purified DAF by immunoprecipitation. Subsequently,  
456 we treated immunoprecipitated DAF with PNGaseF to remove N-glycans, and probed DAF  
457 by western blot and lectin blot with *Sambucus nigra* agglutinin (SNA), which detects  $\alpha 2,6$ -  
458 linked sialic acid (Fig. 9-J). The cumulative effect in DAF MW decrease of PR8 infection

459 and PNGaseF treatment, as well as loss of SNA staining only upon infection, indicates that  
460 PR8 infection specifically removes  $\alpha$ 2,6-linked sialic acid from DAF O-glycans.

461 The affinity of the IAV HA and NA for respective sialic acid conformation is one of the host  
462 species restriction factors (60), avian strains preferring  $\alpha$ 2,3-linked sialic acids, whereas  
463 human strains are able to cleave  $\alpha$ 2,6-linked sialic acids. In accordance with that,  
464 transfection of HEK293T cells with avian-adapted NAs did not impact DAF MW (Fig. 9-K).  
465 Remarkably, transfection with NAs from a H7N9 isolated from a human patient  
466 (A/Anhui/1/2013) and from a H5N6 isolated from a chicken (A/chicken/Jiangxi/02.05  
467 YGYXG023-P/2015) caused a drop in DAF MW. These two NAs are thus able cleave  
468  $\alpha$ 2,6-linked sialic acid residues, indicating they are already adapted to human sialic acid  
469 linkages and indeed both H7N9 (61,62) and H5N6 (63,64) strains have been shown to  
470 cause severe zoonotic disease. These results suggest that analysis of sialic acid cleavage  
471 might be worth exploring as a measure for host adaptation and zoonotic events.

472 Overall, our results unveil DAF as a novel host virulence factor upon IAV infection,  
473 depending on interaction with HA and NA. Specifically, we observed a widespread direct  
474 interaction between NA and DAF with functional implications, which is an unprecedented  
475 way of a virus, via altering a host protein from within the infected cell, modulating the  
476 immune response.

477

478

## Discussion

479

480 This work highlights the importance of a balanced immune response to viral  
481 infections in order to clear the disease without causing immunopathology. Despite its  
482 intrinsic protective role, complement is a documented driver of immunopathology in severe  
483 viral infections such as IAV (31–33), SARS-CoV-2 (28–30) and MERS (27). In the context  
484 of IAV, inhibition of different components of the complement system such as C3a receptor  
485 and C5 decreased immune cell recruitment and activation leading to an ameliorated  
486 disease outcome (31–33). Our work is in accordance with these studies as *Daf*<sup>-/-</sup> mice  
487 have less severe disease upon IAV infection, coupled with reduced C3a levels in BALs,  
488 and a lower number of immune cells recruited to the lungs (Fig. 4-A, B, 6-A, B, 8-A, B).  
489 However, C3 is essential in IAV infection. *C3*<sup>-/-</sup> and *C3*<sup>-/-</sup> / *Daf*<sup>-/-</sup> mice had increased  
490 mortality when compared to the WT (Fig. 3-A; 6-A; 8-A) and *C3*<sup>-/-</sup> mice presented  
491 increased lung inflammation and infiltration of immune cells upon IAV infection (47,65).  
492 These observations show the potential of regulating complement activation as a strategy  
493 to provide resilience to viral infections, without affecting pathogen clearance.

494 Interestingly, infection of *Cd59*<sup>-/-</sup> mice and analysis of CDC in WT and *Daf*<sup>-/-</sup> primary lung  
495 cells indicated that the last step of the complement cascade does not impact disease  
496 outcome in IAV infection (Fig. 2-E, F; 4-C; S2-F, G). Rather, it suggests that earlier  
497 components of the complement cascade, such as anaphylatoxins C3a and/or C5a have a  
498 modulatory role of IAV virulence. This hypothesis agrees with the function of C3a and C5a  
499 as recruiters and activators of the innate immune response, which can lead to  
500 immunopathology (31–33). Our results indicate that, in fact, and contrary to expected, in  
501 IAV infection, lack of DAF leads to reduced activation of complement, lower levels of C3a  
502 and decreased recruitment of monocytes and neutrophils, specifically. The lower levels of  
503 C3a detected in the BALs of *Daf*<sup>-/-</sup> mice could explain the lower numbers of innate immune

504 cells recruited, and decreased tissue damage. However, compared to PR8-HK4,6,  
505 infection with PR8-HK6 altered recruitment of adaptive immune cells, and PR8-HK4 of  
506 innate immune cells, without changing the levels of C3a in *Daf*<sup>-/-</sup> mice. These results  
507 indicate that complement is not the sole recruiter and activator of the immune response,  
508 and that a direct or indirect HA-DAF and/or NA-DAF interaction has additional roles to play  
509 in immune cell recruitment.

510 In fact, we found that HA-DAF interplay impacts recruitment of CD4<sup>+</sup> and CD8<sup>+</sup> T  
511 cells, both of which shown to be essential in the clearance of IAV (66). The lower levels of  
512 these cells in *Daf*<sup>-/-</sup> mice might annul the beneficial effect of lower lung tissue damage  
513 observed at 6 d.p.i.. Indeed, upon PR8-HK6 challenge, mice bodyweight rapidly dropped  
514 at 7 d.p.i., whereas in infection with other viral strains loss of weight started around 4 d.p.i.  
515 and was more gradual, suggesting that the adaptive immune system is implicated in the  
516 process (9,67). Despite HA being amongst the most immunogenic proteins of IAV, and  
517 hence its involvement in adaptive immune response not surprising (67,68), our work  
518 shows for the first time a specific interaction of HA with DAF and the implications of this  
519 axis in T cell recruitment.

520 We also identified a novel function for the viral protein NA, via cleaving sialic acids  
521 of DAF and modulating immune cell recruitment and viral pathogenicity. Remarkably, NA-  
522 mediated cleavage of another host protein, latent TGF- $\beta$ , activates it, which confers a  
523 protective role upon infection (69,70). Here we found that NA cleaves  $\alpha$ 2,6-linked sialic  
524 acids from DAF and hypothesize that this could explain the differences in the numbers of  
525 neutrophils and monocytes recruited to the site of infection. Ablation of neutrophils in IAV  
526 infections have been shown to prevent tissue damage without affecting viral loads (71–74).  
527 In fact, these cells have long been associated with acute respiratory distress syndrome  
528 (75), and extensive neutrophil infiltration and release of neutrophil extracellular traps  
529 (NETs) have been linked to increased pneumonia severity in critical cases of COVID-19

530 (76–78). Despite these observations, neutrophils are important to the host response  
531 against IAV infection as neutrophil depletion resulted in exacerbated viral loads, lung  
532 damage and mortality in mice infected with PR8-HK4,6 (79,80). In addition to neutrophils,  
533 monocytes are readily recruited to sites of IAV challenge where they differentiate into  
534 macrophages or dendritic cells (DC) (81,82) that share many properties with their  
535 conventional counterparts (83) and have been studied upon IAV infection (83,84).  
536 Monocyte-derived macrophages contribute to the inflammation resolution by clearing  
537 apoptotic neutrophils and confer lasting protection against secondary bacterial infections  
538 (84,85). The interaction with apoptotic neutrophils has also been reported to increase  
539 differentiation of monocytes into DC, promoting adherence of CD8<sup>+</sup> T cells (85).  
540 Conversely, monocyte and monocyte-derived cells may contribute to immunopathology, as  
541 their depletion decreased disease severity without altering viral loads (86–88). These  
542 studies show that both cell types are essential for IAV infection but can contribute to tissue  
543 damage, and support our hypothesis that increased immunopathology of WT mice upon  
544 IAV infection is mediated by excessive recruitment of neutrophils and monocytes.

545       The link we identified via NA, DAF and complement establishes a viral mediated  
546 mechanism for maintaining inflammation via increasing the recruitment of immune cells.  
547 The model that we propose and that is depicted in Figure 10 explores an interplay  
548 between HA and NA in modulating the immune response. Previous examples include the  
549 activation of the NK cell sialylated receptors NKp44 and NKp46 by HA at the surface of  
550 infected cells, which is countered by NA-mediated desialylation (89,90). In the case of our  
551 work, it is known that apical delivery of NA to the cell surface is potentiated by HA (91) and  
552 during this transport (and also at the plasma membrane), NA would cleave DAF sialic acid  
553 giving rise to increased activation of complement. Indeed, we observed that IAV infection  
554 induces a drop in DAF MW over the course of infection both in human and murine cell  
555 lines. The drop corresponds to DAF sialic acid content, and NA is necessary and sufficient

556 for this cleavage (Fig. 9-A, C, E, H and J). Moreover, transduction of cells with NA and  
557 thus removal of DAF sialic acid content resulted in an increased C5b-9 deposition (Fig. 9-  
558 I). We propose that the removal of DAF sialic acid content would not lead to a loss of  
559 function, but instead trigger an exaggerated complement response. This is contrary to  
560 what is observed for autoimmune diseases, for which *Daf<sup>-/-</sup>* mice have been widely used  
561 (92–94). These mice have increased disease severity coupled with high complement  
562 activation levels when compared to their WT counterparts, showing that *Daf<sup>-/-</sup>* mice do not  
563 lack the ability to activate the complement and that the mechanism we now describe could  
564 be shared among viruses containing promiscuous NAs. As an alternative, NA-mediated  
565 DAF cleavage could result in the recruitment of innate immune cells by exposing “non-self”  
566 glycans at cell surface, which has been shown to activate complement via the lectin  
567 pathway (95). Besides complement, it could also be recognized by different PRRs (96). At  
568 the moment this hypothesis is speculative but raises concerns about using therapies, such  
569 as DAS181 (97), aiming at decreasing sialic acid levels at cell surface to prevent viral  
570 entry. Interestingly, our work indicates that NA cleavage of sialic acids does not happen  
571 solely at the cell surface, but also in the cytoplasm, as treatment with Zanamivir did not  
572 completely abolish DAF cleavage (Fig. 9-F). To the best of our knowledge, this mechanism  
573 has not been reported before.

574 DAF cleavage provides a possible link between DAF-NA interaction and *in vivo*  
575 pathology. Given that our study shows that sialic acids cleaved by DAF are  $\alpha$ 2,6-linked to  
576 O-glycans, this mechanism may have implications in host species jumps, as for example,  
577 IAV adapted to birds exhibit preference for  $\alpha$ 2,3-linked sialic acids. Interestingly, we  
578 present evidence that NAs derived from two avian-adapted strains, H5N6 and H7N9, were  
579 able to cleave human DAF (Fig. 9-J). As H7N9 and H5N6 outbreaks provoked severe  
580 infections in humans, associated with exacerbated immune response (61–63),



581 hypothetically establishing DAF cleavage as a hallmark of virulence could be a useful tool  
582 to monitor viruses with pandemic potential.

583 In addition, many host proteins including mucins are decorated by sialic acids. Mucins  
584 form an important barrier at the cell surface preventing viral entry (98). These proteins are  
585 also heavily glycosylated, specifically at the terminal part of O-glycans (99), similarly to  
586 DAF, indicating that they could be substrates of NA. As a consequence, the mechanism  
587 we describe could be used to manipulate the extracellular environment and facilitate viral  
588 cell-to-cell transmission. Identification of glycans exposed at the surface of infected cells  
589 and their interaction with viral proteins may help understand the balance between viral  
590 entry and immune response targets and reveal disease resilience pathways prone to  
591 therapeutic intervention.

592

593

## Materials & methods

594

595

### Statistical analyses

596

All statistical analyses were conducted using GraphPad Prism 6. Detailed statistics

597

and number of replicates for all experiments can be found in the figure legends and/or in

598

the manuscript. Bodyweight loss and DAF cleavage: Statistical significance represented as

599

\*p < 0.05, \*\*p < 0.01, \*\*\*p < 0.001, using two-way ANOVA followed by Holm-Sidak multiple

600

comparisons test. Survival curves: Statistical significance compared with WT using Log-

601

rank (Mantel-Cox) test. Compare two groups: Population normality assessed with

602

D'Agostino & Pearson omnibus normality test. Statistical significance using unpaired t-test

603

with Welch's correction for normal populations or Mann-Whitney test for populations

604

whose normality was not proved; Wilcoxon matched-pairs signed rank test for populations

605

whose normality was not proved, but samples were paired. Multiple comparisons:

606

Population normality assessed with D'Agostino & Pearson omnibus normality test.

607

Kruskal-Wallis followed by Dunn's multiple comparisons test for populations whose

608

normality was not proved.

609

610

### Ethics statement

611

All experiments involving mice were performed using 8-week-old littermate

612

C57BL6/6J, C57BL6/6J *Daf*<sup>-/-</sup>, C57BL6/6J *Cd59*<sup>-/-</sup>, C57BL6/6J *C3*<sup>-/-</sup> or C57BL6/6J *C3*<sup>-/-</sup> /

613

*Daf*<sup>-/-</sup> female mice under specific pathogen-free conditions at the Instituto Gulbenkian de

614

Ciência (IGC) biosafety level 2 (BSL-2) animal facility. Animals were group housed in

615

individually ventilated cages with access to food and water *ad libitum*. This research

616

project was ethically reviewed and approved by both the Ethics Committee and the Animal

617

Welfare Body of the IGC (license references: A016/2013 and A013/2019), and by the

618

Portuguese National Entity that regulates the use of laboratory animals (DGAV – Direção

619 Geral de Alimentação e Veterinária (license references: 0421/000/000/2015 and  
620 0421/000/000/2020). All experiments conducted on animals followed the Portuguese  
621 (Decreto-Lei nº 113/2013) and European (Directive 2010/63/EU) legislations, concerning  
622 housing, husbandry and animal welfare.

623

#### 624 Mice infection, lung, BAL and tissue analysis.

625 All mice experiments were conducted in a BSL-2 animal facility. Littermates were  
626 randomly allocated to experimental conditions. Mice were anesthetized with isoflurane  
627 (Abbot) and 30µL of inoculum administered intranasally. Mice were daily monitored for 11  
628 days or sacrificed with CO<sub>2</sub> at indicated timepoints. To comply with best animal welfare  
629 practices, animals that lost more than 25% of their initial weight and did not recover until  
630 the next day were sacrificed. Tissues were collected in aseptic conditions.

631 Lung viral loads were collected from right lower lobes using tungsten carbide beads  
632 (Qiagen) in a TissueLyser II (Qiagen) at 20s<sup>-1</sup> for 3min. After centrifugation, supernatants  
633 were collected and titrated by plaque assay (100,101).

634 Bronchoalveolar lavage (BAL) of the whole lung was performed with 1ml sterile  
635 PBS via tracheal cannula. After centrifugation, supernatants were used for ELISA analysis  
636 (Mouse C3a (TECOmedical, TE1038) or Mouse IFN-γ DuoSet ELISA (R&D Systems,  
637 DY485)), following manufacturer's instructions, and cells analyzed by flow cytometry.  
638 Unspecific staining was minimized with Fc blocking (rat anti-mouse CD16/CD32, IGC  
639 antibody facility, clone 2.4G2). Cells were incubated with primary antibodies (Table S2) in  
640 FC buffer, 20min at 4°C, stained with Zombie Aqua™ Fixable Viability Kit (BioLegend,  
641 423101) and fixed with IC fixation buffer according to manufacturer's recommendations.  
642 Flow cytometry analysis of cell populations was performed in a BD LSR Fortessa X-20  
643 SORP (BD Biosciences) equipped with BD FACSDiva™ 8 and FlowJo 10 software (Tree

644 Star Inc., Ashland, OR, USA), and absolute numbers obtained with Perfect-Count  
645 Microspheres™ (Cytognos, CYT-PCM).

646

#### 647 Immune cell depletion

648 Natural killer (NK) cells were depleted by intraperitoneal (IP) injection of 200µg α-  
649 NK1.1 (IGC antibody facility, clone PK136) in 200µl PBS every 72h, starting 72h before  
650 infection.

651

#### 652 Histology and immunohistochemistry (IHC)

653 Histological scoring was conducted as in (45), and expressed as the sum of the  
654 parameter described in Table S1. Scoring was performed blindly by a pathologist. For IHC  
655 tissue sections were deparaffinized, rehydrated, and heated in citrate buffer (40mM  
656 sodium citrate dihydrate, 60mM citric acid, pH 6) and blocked with 1:50 Fc block reagent  
657 (rat anti-mouse CD16/CD32, IGC antibody facility, clone 2.4G2). Slides were then  
658 incubated with rabbit α-NP (102) 1:1000 for 16h at 4°C. After blocking of endogenous  
659 peroxidases sections were incubated with ImmPRESS® HRP Horse Anti-Rabbit IgG  
660 Polymer Detection Kit (Vector Laboratories, MP-7401-15) for 1h at RT and then with DAB  
661 substrate (Roche, 11718096001) according to manufacturer's instructions. Finally, lung  
662 sections were contrasted with Mayer Hematoxylin and images taken in a NanoZoomer-SQ  
663 Digital slide scanner (Hamamatsu Photonics).

664

#### 665 Complement dependent toxicity and C5b-9 deposition

666 Lung primary cells from WT or *Daf<sup>-/-</sup>* mice were infected as described below with  
667 indicated IAVs for 12h, collected and suspended in veronal buffer (CompTech, B100).  
668 Serum from WT mice (or heat-inactivated at 56°C, 30min) was added at a final  
669 concentration of 50% (v/v) and incubated at 37°C, 5% CO<sub>2</sub> for 1h. Viability was assessed

670 by flow cytometry using Zombie Aqua™ Fixable Viability Kit after fixation IC fixation buffer  
671 following manufacturer's indications.

672 C5b-9 deposition measurement was adapted from (103). Lentivirus encoding NA-GFP  
673 WT/E229A was added to A549 cells. Cells were then suspended in veronal buffer and  
674 human serum (Sigma-Aldrich, H4522) (or heat-inactivated for 30min at 56°C), added at a  
675 final concentration of 50% (v/v). After 15min incubation, C5b-9 deposition was assessed  
676 by flow cytometry using  $\alpha$ -C5b-9 (Abcam, ab55811, 1:100) and  $\alpha$ -Mouse Alexa Fluor 647  
677 (Invitrogen, A31571, 1:1000). Cells were fixed with IC Fixation Buffer according to  
678 manufacturer's indications.

679

#### 680 Cell lines, transfections and infection

681 Madin-Darby Canine Kidney (MDCK), Human Embryonic Kidney 293 T  
682 (HEK293T), and human alveolar basal (A549) cells were a kind gift from Prof. Paul Digard  
683 (Roslin Institute, UK). Mouse embryonic fibroblasts (MEFs) were isolated from WT and  
684 *Daf*<sup>-/-</sup> mice E13.5 to E15.5 embryos as previously described (104). Primary lung cells were  
685 isolated from WT and *Daf*<sup>-/-</sup> mice. Briefly, 1.5ml of sterile collagenase D (0.5mg/ml in PBS,  
686 Roche, 11088858001) and 0.5ml of melted agarose (1% in PBS, Lonza, 50004) were  
687 instilled in lungs of mice after exsanguination and PBS perfusion. Whole lungs were then  
688 collected and incubated with collagenase D 40min at RT. After dissection in complete  
689 DMEM supplemented with 5U DNase I (NZYTech, MB19901), cells were collected and  
690 plated in a 6-well plate at a density of  $9 \times 10^5$  cells/well and incubated for 48h at 37°C, 5%  
691 CO<sub>2</sub>. All cell lines were cultured in complete DMEM and incubated at 37°C, 5% CO<sub>2</sub>.

692 Transfection of HEK293T cells was performed using Lipofectamine 2000  
693 (ThermoFisher, 11668027) according to manufacturer's recommendations. Plasmids  
694 encoding NA genes from following strains were kindly provided by Dr. Holly Shelton (The  
695 Pirbright Institute, UK) and were synthesized by GeneArt (Invitrogen) and cloned into a

696 pHW2000 vector (105): H6N1 A/chicken/Taiwan/67/2013 (GenBank accession no.  
697 KJ162862), H9N2 A/chicken/Pakistan/UDL-01/08 (106), H5N2  
698 A/goose/Taiwan/01031/2015 (107), H5N6 A/chicken/Jiangxi/02.05 YGYXG023-P/2015  
699 (107), H4N6 A/chicken/Hunan/S1267/2010 (GenBank accession no. KU160821), H10N8  
700 A/chicken/Jiangxi/1204/2014 (GenBank accession no. KP285359), H5N8 A/scarlet  
701 ibis/Germany/Ar44-L01279/2015 (107), H7N9 A/Anhui/1/2013 (108).

702 One-step infections were carried out at a multiplicity of infection (MOI) of 3 in  
703 serum-free DMEM for 45min and then overlaid with complete DMEM and kept at 37 °C  
704 and 5% CO<sub>2</sub> for the duration of the experiment.

705

#### 706 Western blot

707 Western blotting was performed according to standard procedures and imaged  
708 using a LI-COR Biosciences Odyssey Infrared Imaging System. Primary and secondary  
709 antibodies used are in Table S2.

710

#### 711 Viruses and titration

712 Human circulating strains A/California/7/2009 (Cal, H1N1) and A/England/195/2009  
713 (Eng, H1N1) were kindly provided by Prof. Paul Digard). Reverse-genetics derived  
714 A/Puerto Rico/8/34 (PR8) and A/X-31 (PR8-HK4,6) were used as model viruses. Reverse-  
715 genetics derived chimeric PR8 containing the segment 4 from A/Hong Kong/1/1968, seg4-  
716 HK68 (PR8-HK4), or the segment 6 (PR8-HK6) were produced as previously described  
717 (105,109,110). pDual plasmids were a kind gift from Dr. Ron Fouchier (Erasmus MC,  
718 Netherlands). PR8 NA-E229A (55) was generated by reverse genetics after site directed  
719 mutagenesis of pDual::segment6. All viruses were amplified in embryonated chicken eggs  
720 and titrated using plaque assay as previously described (100,101).

721 Lentivirus were produced in HEK293T cells transfected with the following plasmids  
722 (ThermoFisher, OHS4735): 6µg pLEX-MCS-1::NA-GFP WT/E229A, 4.2µg psPAX2, 1.8µg  
723 pMD2.G. 72h hours after transfection, medium containing lentivirus was collected and  
724 stored at -80°C.

725

#### 726 Bacteria and cloning.

727 All transformations for cloning or plasmid amplification were performed in  
728 *Escherichia coli* XL10 Gold (Agilent) according to manufacturer's instructions.

729 Viral RNA (vRNA) was extracted from egg-grown viral stocks using QIAamp Viral  
730 RNA Mini Kit (Qiagen, 50952904) according to manufacturer's instructions. From purified  
731 vRNA, NA cDNA was produced using NZY M-MuLV First-Strand cDNA Synthesis Kit  
732 (NZYTech, MB17302) with primer "NA\_Fw\_HindIII" following manufacturer's  
733 recommendations. To produce pEGFP-N1::NA, NA was then amplified and cloned in  
734 HindIII-KpnI restriction sites of pEGFP-N1. To generate pLEX-MCS-1::NA-GFP, NA-GFP  
735 was amplified from pEGFP-N1::NA and cloned into NotI/XhoI sites of pLEX-MCS-1.  
736 pDual::seg6-E229A and pEGFP-N1::NA-E229A were generated by site directed  
737 mutagenesis of pDual::seg6 and pEGFP-N1::NA respectively, using the QuikChange Site-  
738 Directed Mutagenesis Kit (Agilent, 200518), according to manufacturer's instructions.  
739 Primer sequences are indicated in Table S3.

740

#### 741 DAF glycosylation

742 A549 cells were infected with PR8 as described above. After 12h of infection, cells  
743 were lysed with lysis buffer 17 (R&D Systems, 895943) and protein quantified using  
744 bicinchoninic acid protein assay (BCA) (Pierce™, 23225). Protein G Sepharose 4 Fast  
745 flow beads (GE Healthcare, GE17-0618-01) were incubated with α-DAF (Abcam,  
746 ab133684) for 5h and then Protein G-DAF complexes were crosslinked using

747 bis(sulfosuccinimidyl)suberate (BS<sup>3</sup>) (Sigma, S5799). Protein from total cell extracts (100  
748 µg) were then added to the antibody Protein G complex and incubated 16h at 4 °C in a  
749 rotator mixer. Washing steps were performed with PBS and samples used for downstream  
750 analysis.

751           After DAF immunoprecipitation, removal of N-glycans was performed by digestion  
752 with PNGaseF (New England Biolabs, P0704S), according to manufacturer's instructions.  
753 For blotting experiments gels were transferred onto nitrocellulose and unspecific binding  
754 blocked using 5% BSA and 2% polyvinylpyrrolidone (PVP) for blot detection with α-DAF or  
755 biotinylated *Sambucus nigra* agglutinin (SNA) (Vector Laboratories B-1305-2),  
756 respectively. DAF was detected with HRP-conjugated goat anti-rabbit (Jackson  
757 ImmunoResearch, 111-035-144) and SNA with Vectastain Avidin/Biotin Complex (Vector  
758 Laboratories, PK-4000) incubation. Detection was performed by enhanced  
759 chemiluminescence (ECL) (GE Healthcare, RPN2232) and film sheet exposure.

760



761

## References

762

- 763 1. Iwasaki A, Foxman EF, Molony RD. Early local immune defences in the respiratory  
764 tract. *Nat Rev Immunol*. 2017 Jan;17(1):7–20.
- 765 2. Iwasaki A, Pillai PS. Innate immunity to influenza virus infection. *Nat Rev Immunol*.  
766 2014 May;14(5):315–28.
- 767 3. Gargaglioni LH, Marques DA. Let's talk about sex in the context of COVID-19. *J*  
768 *Appl Physiol Bethesda Md* 1985. 2020 Jun 1;128(6):1533–8.
- 769 4. Gebhard C, Regitz-Zagrosek V, Neuhauser HK, Morgan R, Klein SL. Impact of sex  
770 and gender on COVID-19 outcomes in Europe. *Biol Sex Differ*. 2020 May 25;11(1):29.
- 771 5. Haitao T, Vermunt JV, Abeykoon J, Ghamrawi R, Gunaratne M, Jayachandran M,  
772 et al. COVID-19 and Sex Differences: Mechanisms and Biomarkers. *Mayo Clin Proc*. 2020  
773 Oct;95(10):2189–203.
- 774 6. Medzhitov R, Schneider DS, Soares MP. Disease tolerance as a defense strategy.  
775 *Science*. 2012 Feb 24;335(6071):936–41.
- 776 7. Sell S. Immunopathology. *Am J Pathol*. 1978 Jan;90(1):211–80.
- 777 8. WHO. Influenza (Seasonal) [Internet]. [cited 2021 Feb 9]. Available from:  
778 [https://www.who.int/en/news-room/fact-sheets/detail/influenza-\(seasonal\)](https://www.who.int/en/news-room/fact-sheets/detail/influenza-(seasonal))
- 779 9. Krammer F, Smith GJD, Fouchier RAM, Peiris M, Kedzierska K, Doherty PC, et al.  
780 Influenza. *Nat Rev Dis Primer*. 2018 Jun 28;4(1):3.
- 781 10. Taubenberger JK, Morens DM. The pathology of influenza virus infections. *Annu*  
782 *Rev Pathol*. 2008;3:499–522.
- 783 11. Uyeki TM. High-risk Groups for Influenza Complications. *JAMA*. 2020 Dec  
784 8;324(22):2334.
- 785 12. Taubenberger JK, Morens DM. 1918 Influenza: the mother of all pandemics.  
786 *Emerg Infect Dis*. 2006 Jan;12(1):15–22.
- 787 13. Melvin JA, Bomberger JM. Compromised Defenses: Exploitation of Epithelial  
788 Responses During Viral-Bacterial Co-Infection of the Respiratory Tract. *PLoS Pathog*.  
789 2016 Sep;12(9):e1005797.
- 790 14. Rowe HM, Meliopoulos VA, Iverson A, Bomme P, Schultz-Cherry S, Rosch JW.  
791 Direct interactions with influenza promote bacterial adherence during respiratory  
792 infections. *Nat Microbiol*. 2019 Aug;4(8):1328–36.
- 793 15. Siegel SJ, Roche AM, Weiser JN. Influenza promotes pneumococcal growth during  
794 coinfection by providing host sialylated substrates as a nutrient source. *Cell Host Microbe*.  
795 2014 Jul 9;16(1):55–67.
- 796 16. Talmi-Frank D, Altboum Z, Solomonov I, Udi Y, Jaitin DA, Klepfish M, et al.  
797 Extracellular Matrix Proteolysis by MT1-MMP Contributes to Influenza-Related Tissue  
798 Damage and Mortality. *Cell Host Microbe*. 2016 Oct 12;20(4):458–70.
- 799 17. Damjanovic D, Small C-L, Jeyanathan M, Jeyanathan M, McCormick S, Xing Z.  
800 Immunopathology in influenza virus infection: uncoupling the friend from foe. *Clin Immunol*  
801 *Orlando Fla*. 2012 Jul;144(1):57–69.
- 802 18. Newton AH, Cardani A, Braciale TJ. The host immune response in respiratory virus  
803 infection: balancing virus clearance and immunopathology. *Semin Immunopathol*. 2016  
804 Jul;38(4):471–82.
- 805 19. Arunachalam PS, Wimmers F, Mok CKP, Perera RAPM, Scott M, Hagan T, et al.  
806 Systems biological assessment of immunity to mild versus severe COVID-19 infection in  
807 humans. *Science*. 2020 Sep 4;369(6508):1210–20.
- 808 20. Hadjadj J, Yatim N, Barnabei L, Corneau A, Boussier J, Smith N, et al. Impaired  
809 type I interferon activity and inflammatory responses in severe COVID-19 patients.  
810 *Science*. 2020 Aug 7;369(6504):718–24.

- 811 21. Freeley S, Kemper C, Le Friec G. The “ins and outs” of complement-driven  
812 immune responses. *Immunol Rev.* 2016 Nov;274(1):16–32.
- 813 22. Merle NS, Church SE, Fremeaux-Bacchi V, Roumenina LT. Complement System  
814 Part I - Molecular Mechanisms of Activation and Regulation. *Front Immunol.* 2015;6:262.
- 815 23. Sarma JV, Ward PA. The complement system. *Cell Tissue Res.* 2011  
816 Jan;343(1):227–35.
- 817 24. Radicioni G, Cao R, Carpenter J, Ford AA, Wang T, Li L, et al. The innate immune  
818 properties of airway mucosal surfaces are regulated by dynamic interactions between  
819 mucins and interacting proteins: the mucin interactome. *Mucosal Immunol.* 2016  
820 Nov;9(6):1442–54.
- 821 25. Gralinski LE, Sheahan TP, Morrison TE, Menachery VD, Jensen K, Leist SR, et al.  
822 Complement Activation Contributes to Severe Acute Respiratory Syndrome Coronavirus  
823 Pathogenesis. *mBio.* 2018 Oct 9;9(5).
- 824 26. Wang R, Xiao H, Guo R, Li Y, Shen B. The role of C5a in acute lung injury induced  
825 by highly pathogenic viral infections. *Emerg Microbes Infect.* 2015 May;4(5):e28.
- 826 27. Jiang Y, Zhao G, Song N, Li P, Chen Y, Guo Y, et al. Blockade of the C5a-C5aR  
827 axis alleviates lung damage in hDPP4-transgenic mice infected with MERS-CoV. *Emerg*  
828 *Microbes Infect.* 2018 Apr 24;7(1):77.
- 829 28. Fletcher-Sandersjö A, Bellander B-M. Is COVID-19 associated thrombosis caused  
830 by overactivation of the complement cascade? A literature review. *Thromb Res.* 2020  
831 Oct;194:36–41.
- 832 29. Lo MW, Kemper C, Woodruff TM. COVID-19: Complement, Coagulation, and  
833 Collateral Damage. *J Immunol Baltim Md 1950.* 2020 Sep 15;205(6):1488–95.
- 834 30. Polycarpou A, Howard M, Farrar CA, Greenlaw R, Fanelli G, Wallis R, et al.  
835 Rationale for targeting complement in COVID-19. *EMBO Mol Med.* 2020 Aug  
836 7;12(8):e12642.
- 837 31. Garcia CC, Weston-Davies W, Russo RC, Tavares LP, Rachid MA, Alves-Filho JC,  
838 et al. Complement C5 activation during influenza A infection in mice contributes to  
839 neutrophil recruitment and lung injury. *PloS One.* 2013;8(5):e64443.
- 840 32. Song N, Li P, Jiang Y, Sun H, Cui J, Zhao G, et al. C5a receptor1 inhibition  
841 alleviates influenza virus-induced acute lung injury. *Int Immunopharmacol.* 2018  
842 Jun;59:12–20.
- 843 33. Sun S, Zhao G, Liu C, Wu X, Guo Y, Yu H, et al. Inhibition of complement  
844 activation alleviates acute lung injury induced by highly pathogenic avian influenza H5N1  
845 virus infection. *Am J Respir Cell Mol Biol.* 2013 Aug;49(2):221–30.
- 846 34. Pandya PH, Fisher AJ, Mickler EA, Temm CJ, Lipking KP, Gracon A, et al.  
847 Hypoxia-Inducible Factor-1 $\alpha$  Regulates CD55 in Airway Epithelium. *Am J Respir Cell Mol*  
848 *Biol.* 2016 Dec;55(6):889–98.
- 849 35. Reddy P, Caras I, Krieger M. Effects of O-linked glycosylation on the cell surface  
850 expression and stability of decay-accelerating factor, a glycopospholipid-anchored  
851 membrane protein. *J Biol Chem.* 1989 Oct 15;264(29):17329–36.
- 852 36. Varsano S, Frolkis I, Ophir D. Expression and distribution of cell-membrane  
853 complement regulatory glycoproteins along the human respiratory tract. *Am J Respir Crit*  
854 *Care Med.* 1995 Sep;152(3):1087–93.
- 855 37. Hoffman EM. Inhibition of complement by a substance isolated from human  
856 erythrocytes. I. Extraction from human erythrocyte stromata. *Immunochemistry.* 1969  
857 May;6(3):391–403.
- 858 38. Hoffmann EM. Inhibition of complement by a substance isolated from human  
859 erythrocytes. II. Studies on the site and mechanism of action. *Immunochemistry.* 1969  
860 May;6(3):405–19.
- 861 39. Kim DD, Song W-C. Membrane complement regulatory proteins. *Clin Immunol*

- 862 Orlando Fla. 2006 Mar;118(2–3):127–36.
- 863 40. Hillmen P, Lewis SM, Bessler M, Luzzatto L, Dacie JV. Natural history of  
864 paroxysmal nocturnal hemoglobinuria. *N Engl J Med*. 1995 Nov 9;333(19):1253–8.
- 865 41. Ozen A, Comrie WA, Ardy RC, Domínguez Conde C, Dalgic B, Beser ÖF, et al.  
866 CD55 Deficiency, Early-Onset Protein-Losing Enteropathy, and Thrombosis. *N Engl J*  
867 *Med*. 2017 Jul 6;377(1):52–61.
- 868 42. Lee N, Cao B, Ke C, Lu H, Hu Y, Tam CHT, et al. IFITM3, TLR3, and CD55 Gene  
869 SNPs and Cumulative Genetic Risks for Severe Outcomes in Chinese Patients With  
870 H7N9/H1N1pdm09 Influenza. *J Infect Dis*. 2017 Jul 1;216(1):97–104.
- 871 43. Zhou J, To KK-W, Dong H, Cheng Z-S, Lau CC-Y, Poon VKM, et al. A functional  
872 variation in CD55 increases the severity of 2009 pandemic H1N1 influenza A virus  
873 infection. *J Infect Dis*. 2012 Aug 15;206(4):495–503.
- 874 44. Kilbourne ED. Future influenza vaccines and the use of genetic recombinants. *Bull*  
875 *World Health Organ*. 1969;41(3):643–5.
- 876 45. Nieto A, Vasilijevic J, Santos NB, Zamarreño N, López P, Amorim MJ, et al.  
877 Mutation S110L of H1N1 Influenza Virus Hemagglutinin: A Potent Determinant of  
878 Attenuation in the Mouse Model. *Front Immunol*. 2019;10:132.
- 879 46. Kopf M, Abel B, Gallimore A, Carroll M, Bachmann MF. Complement component  
880 C3 promotes T-cell priming and lung migration to control acute influenza virus infection.  
881 *Nat Med*. 2002 Apr;8(4):373–8.
- 882 47. O'Brien KB, Morrison TE, Dundore DY, Heise MT, Schultz-Cherry S. A protective  
883 role for complement C3 protein during pandemic 2009 H1N1 and H5N1 influenza A virus  
884 infection. *PloS One*. 2011 Mar 9;6(3):e17377.
- 885 48. Ho AWS, Prabhu N, Betts RJ, Ge MQ, Dai X, Hutchinson PE, et al. Lung CD103+  
886 dendritic cells efficiently transport influenza virus to the lymph node and load viral antigen  
887 onto MHC class I for presentation to CD8 T cells. *J Immunol Baltim Md 1950*. 2011 Dec  
888 1;187(11):6011–21.
- 889 49. Califano D, Furuya Y, Roberts S, Avram D, McKenzie ANJ, Metzger DW. IFN- $\gamma$   
890 increases susceptibility to influenza A infection through suppression of group II innate  
891 lymphoid cells. *Mucosal Immunol*. 2018 Jan;11(1):209–19.
- 892 50. McAuley JL, Gilbertson BP, Trifkovic S, Brown LE, McKimm-Breschkin JL.  
893 Influenza Virus Neuraminidase Structure and Functions. *Front Microbiol*. 2019;10:39.
- 894 51. Fuller SD, Bravo R, Simons K. An enzymatic assay reveals that proteins destined  
895 for the apical or basolateral domains of an epithelial cell line share the same late Golgi  
896 compartments. *EMBO J*. 1985 Feb;4(2):297–307.
- 897 52. Hutchinson EC, Yamauchi Y. Understanding Influenza. *Methods Mol Biol Clifton*  
898 *NJ*. 2018;1836:1–21.
- 899 53. Lublin DM, Krsek-Staples J, Pangburn MK, Atkinson JP. Biosynthesis and  
900 glycosylation of the human complement regulatory protein decay-accelerating factor. *J*  
901 *Immunol Baltim Md 1950*. 1986 Sep 1;137(5):1629–35.
- 902 54. Gagneux P, Aebi M, Varki A. Evolution of Glycan Diversity. In: Varki A, Cummings  
903 RD, Esko JD, Stanley P, Hart GW, Aebi M, et al., editors. *Essentials of Glycobiology*  
904 [Internet]. 3rd ed. Cold Spring Harbor (NY): Cold Spring Harbor Laboratory Press; 2015  
905 [cited 2021 Feb 9]. Available from: <http://www.ncbi.nlm.nih.gov/books/NBK453067/>
- 906 55. Doyle TM, Jaentschke B, Van Domselaar G, Hashem AM, Farnsworth A, Forbes  
907 NE, et al. The universal epitope of influenza A viral neuraminidase fundamentally  
908 contributes to enzyme activity and viral replication. *J Biol Chem*. 2013 Jun  
909 21;288(25):18283–9.
- 910 56. Coyne KE, Hall SE, Thompson S, Arce MA, Kinoshita T, Fujita T, et al. Mapping of  
911 epitopes, glycosylation sites, and complement regulatory domains in human decay  
912 accelerating factor. *J Immunol Baltim Md 1950*. 1992 Nov 1;149(9):2906–13.

- 913 57. Bhide GP, Colley KJ. Sialylation of N-glycans: mechanism, cellular  
914 compartmentalization and function. *Histochem Cell Biol.* 2017 Feb;147(2):149–74.
- 915 58. Joseph U, Su YCF, Vijaykrishna D, Smith GJD. The ecology and adaptive  
916 evolution of influenza A interspecies transmission. *Influenza Other Respir Viruses.* 2017  
917 Jan;11(1):74–84.
- 918 59. Rogers GN, Paulson JC. Receptor determinants of human and animal influenza  
919 virus isolates: differences in receptor specificity of the H3 hemagglutinin based on species  
920 of origin. *Virology.* 1983 Jun;127(2):361–73.
- 921 60. Yoon S-W, Webby RJ, Webster RG. Evolution and ecology of influenza A viruses.  
922 *Curr Top Microbiol Immunol.* 2014;385:359–75.
- 923 61. Wu X, Xiao L, Li L. Research progress on human infection with avian influenza  
924 H7N9. *Front Med.* 2020 Feb;14(1):8–20.
- 925 62. Zhou J, Wang D, Gao R, Zhao B, Song J, Qi X, et al. Biological features of novel  
926 avian influenza A (H7N9) virus. *Nature.* 2013 Jul 25;499(7459):500–3.
- 927 63. Bi Y, Tan S, Yang Y, Wong G, Zhao M, Zhang Q, et al. Clinical and Immunological  
928 Characteristics of Human Infections With H5N6 Avian Influenza Virus. *Clin Infect Dis Off  
929 Publ Infect Dis Soc Am.* 2019 Mar 19;68(7):1100–9.
- 930 64. Bonilla-Aldana DK, Aguirre-Florez M, Villamizar-Peña R, Gutiérrez-Ocampo E,  
931 Henao-Martínez JF, Cvetkovic-Vega A, et al. After SARS-CoV-2, will H5N6 and other  
932 influenza viruses follow the pandemic path? *Infez Med.* 2020 Dec 1;28(4):475–85.
- 933 65. Kandasamy M, Ying PC, Ho AWS, Sumatoh HR, Schlitzer A, Hughes TR, et al.  
934 Complement mediated signaling on pulmonary CD103(+) dendritic cells is critical for their  
935 migratory function in response to influenza infection. *PLoS Pathog.* 2013  
936 Jan;9(1):e1003115.
- 937 66. Topham DJ, Tripp RA, Doherty PC. CD8+ T cells clear influenza virus by perforin  
938 or Fas-dependent processes. *J Immunol Baltim Md 1950.* 1997 Dec 1;159(11):5197–200.
- 939 67. Chen X, Liu S, Goraya MU, Maarouf M, Huang S, Chen J-L. Host Immune  
940 Response to Influenza A Virus Infection. *Front Immunol.* 2018;9:320.
- 941 68. Krammer F. The human antibody response to influenza A virus infection and  
942 vaccination. *Nat Rev Immunol.* 2019 Jun;19(6):383–97.
- 943 69. Carlson CM, Turpin EA, Moser LA, O'Brien KB, Cline TD, Jones JC, et al.  
944 Transforming growth factor- $\beta$ : activation by neuraminidase and role in highly pathogenic  
945 H5N1 influenza pathogenesis. *PLoS Pathog.* 2010 Oct 7;6(10):e1001136.
- 946 70. Schultz-Cherry S, Hinshaw VS. Influenza virus neuraminidase activates latent  
947 transforming growth factor beta. *J Virol.* 1996 Dec;70(12):8624–9.
- 948 71. Narasaraju T, Yang E, Samy RP, Ng HH, Poh WP, Liew A-A, et al. Excessive  
949 neutrophils and neutrophil extracellular traps contribute to acute lung injury of influenza  
950 pneumonitis. *Am J Pathol.* 2011 Jul;179(1):199–210.
- 951 72. Perrone LA, Plowden JK, García-Sastre A, Katz JM, Tumpey TM. H5N1 and 1918  
952 pandemic influenza virus infection results in early and excessive infiltration of  
953 macrophages and neutrophils in the lungs of mice. *PLoS Pathog.* 2008 Aug  
954 1;4(8):e1000115.
- 955 73. Sakai S, Kawamata H, Mantani N, Kogure T, Shimada Y, Terasawa K, et al.  
956 Therapeutic effect of anti-macrophage inflammatory protein 2 antibody on influenza virus-  
957 induced pneumonia in mice. *J Virol.* 2000 Mar;74(5):2472–6.
- 958 74. Zhu B, Zhang R, Li C, Jiang L, Xiang M, Ye Z, et al. BCL6 modulates tissue  
959 neutrophil survival and exacerbates pulmonary inflammation following influenza virus  
960 infection. *Proc Natl Acad Sci U S A.* 2019 Jun 11;116(24):11888–93.
- 961 75. Weiland JE, Davis WB, Holter JF, Mohammed JR, Dorinsky PM, Gadek JE. Lung  
962 neutrophils in the adult respiratory distress syndrome. Clinical and pathophysiologic  
963 significance. *Am Rev Respir Dis.* 1986 Feb;133(2):218–25.

- 964 76. Barnes BJ, Adrover JM, Baxter-Stoltzfus A, Borczuk A, Cools-Lartigue J, Crawford  
965 JM, et al. Targeting potential drivers of COVID-19: Neutrophil extracellular traps. *J Exp*  
966 *Med*. 2020 Jun 1;217(6).
- 967 77. Java A, Apicelli AJ, Liszewski MK, Coler-Reilly A, Atkinson JP, Kim AH, et al. The  
968 complement system in COVID-19: friend and foe? *JCI Insight*. 2020 Aug 6;5(15).
- 969 78. Zuo Y, Yalavarthi S, Shi H, Gockman K, Zuo M, Madison JA, et al. Neutrophil  
970 extracellular traps in COVID-19. *JCI Insight*. 2020 Jun 4;5(11).
- 971 79. Tate MD, Ioannidis LJ, Croker B, Brown LE, Brooks AG, Reading PC. The role of  
972 neutrophils during mild and severe influenza virus infections of mice. *PloS One*. 2011 Mar  
973 14;6(3):e17618.
- 974 80. Tate MD, Deng Y-M, Jones JE, Anderson GP, Brooks AG, Reading PC.  
975 Neutrophils ameliorate lung injury and the development of severe disease during influenza  
976 infection. *J Immunol Baltim Md 1950*. 2009 Dec 1;183(11):7441–50.
- 977 81. Williams M, Mildner A, Yona S. Developmental and Functional Heterogeneity of  
978 Monocytes. *Immunity*. 2018 Oct 16;49(4):595–613.
- 979 82. Short KR, Kroeze EJBV, Fouchier RAM, Kuiken T. Pathogenesis of influenza-  
980 induced acute respiratory distress syndrome. *Lancet Infect Dis*. 2014 Jan;14(1):57–69.
- 981 83. Coillard A, Segura E. In vivo Differentiation of Human Monocytes. *Front Immunol*.  
982 2019;10:1907.
- 983 84. Duan M, Hibbs ML, Chen W. The contributions of lung macrophage and monocyte  
984 heterogeneity to influenza pathogenesis. *Immunol Cell Biol*. 2017 Mar;95(3):225–35.
- 985 85. Lim K, Kim T-H, Trzeciak A, Amitrano AM, Reilly EC, Prizant H, et al. In situ  
986 neutrophil efferocytosis shapes T cell immunity to influenza infection. *Nat Immunol*. 2020  
987 Sep;21(9):1046–57.
- 988 86. Dawson TC, Beck MA, Kuziel WA, Henderson F, Maeda N. Contrasting effects of  
989 CCR5 and CCR2 deficiency in the pulmonary inflammatory response to influenza A virus.  
990 *Am J Pathol*. 2000 Jun;156(6):1951–9.
- 991 87. Herold S, Steinmueller M, von Wulffen W, Cakarova L, Pinto R, Pleschka S, et al.  
992 Lung epithelial apoptosis in influenza virus pneumonia: the role of macrophage-expressed  
993 TNF-related apoptosis-inducing ligand. *J Exp Med*. 2008 Dec 22;205(13):3065–77.
- 994 88. Lin KL, Suzuki Y, Nakano H, Ramsburg E, Gunn MD. CCR2+ monocyte-derived  
995 dendritic cells and exudate macrophages produce influenza-induced pulmonary immune  
996 pathology and mortality. *J Immunol Baltim Md 1950*. 2008 Feb 15;180(4):2562–72.
- 997 89. Bar-On Y, Seidel E, Tsukerman P, Mandelboim M, Mandelboim O. Influenza virus  
998 uses its neuraminidase protein to evade the recognition of two activating NK cell receptors.  
999 *J Infect Dis*. 2014 Aug 1;210(3):410–8.
- 1000 90. Duev-Cohen A, Bar-On Y, Glasner A, Berhani O, Ophir Y, Levi-Schaffer F, et al.  
1001 The human 2B4 and NTB-A receptors bind the influenza viral hemagglutinin and co-  
1002 stimulate NK cell cytotoxicity. *Oncotarget*. 2016 Mar 15;7(11):13093–105.
- 1003 91. Ohkura T, Momose F, Ichikawa R, Takeuchi K, Morikawa Y. Influenza A virus  
1004 hemagglutinin and neuraminidase mutually accelerate their apical targeting through  
1005 clustering of lipid rafts. *J Virol*. 2014 Sep 1;88(17):10039–55.
- 1006 92. Miwa T, Maldonado MA, Zhou L, Yamada K, Gilkeson GS, Eisenberg RA, et al.  
1007 Decay-accelerating factor ameliorates systemic autoimmune disease in MRL/lpr mice via  
1008 both complement-dependent and -independent mechanisms. *Am J Pathol*. 2007  
1009 Apr;170(4):1258–66.
- 1010 93. Miwa T, Maldonado MA, Zhou L, Sun X, Luo HY, Cai D, et al. Deletion of decay-  
1011 accelerating factor (CD55) exacerbates autoimmune disease development in MRL/lpr  
1012 mice. *Am J Pathol*. 2002 Sep;161(3):1077–86.
- 1013 94. Soltys J, Halperin JA, Xuebin Q. DAF/CD55 and Protectin/CD59 modulate adaptive  
1014 immunity and disease outcome in experimental autoimmune myasthenia gravis. *J*

- 1015 Neuroimmunol. 2012 Mar;244(1–2):63–9.
- 1016 95. Varki A, Gagneux P. Multifarious roles of sialic acids in immunity. *Ann N Y Acad*  
1017 *Sci.* 2012 Apr;1253:16–36.
- 1018 96. Patel MC, Shirey KA, Boukhvalova MS, Vogel SN, Blanco JCG. Serum High-  
1019 Mobility-Group Box 1 as a Biomarker and a Therapeutic Target during Respiratory Virus  
1020 Infections. *mBio.* 2018 Mar 13;9(2).
- 1021 97. Marjuki H, Mishin VP, Chesnokov AP, De La Cruz JA, Fry AM, Villanueva J, et al.  
1022 An investigational antiviral drug, DAS181, effectively inhibits replication of zoonotic  
1023 influenza A virus subtype H7N9 and protects mice from lethality. *J Infect Dis.* 2014 Aug  
1024 1;210(3):435–40.
- 1025 98. Hariri BM, Cohen NA. New insights into upper airway innate immunity. *Am J Rhinol*  
1026 *Allergy.* 2016 Sep;30(5):319–23.
- 1027 99. Zanin M, Baviskar P, Webster R, Webby R. The Interaction between Respiratory  
1028 Pathogens and Mucus. *Cell Host Microbe.* 2016 Feb 10;19(2):159–68.
- 1029 100. Gauth CR, Smith TF. Replication and plaque assay of influenza virus in an  
1030 established line of canine kidney cells. *Appl Microbiol.* 1968 Apr;16(4):588–94.
- 1031 101. Matrosovich M, Matrosovich T, Garten W, Klenk H-D. New low-viscosity overlay  
1032 medium for viral plaque assays. *Virol J.* 2006 Aug 31;3:63.
- 1033 102. Amorim MJ, Bruce EA, Read EKC, Foeglein A, Mahen R, Stuart AD, et al. A  
1034 Rab11- and microtubule-dependent mechanism for cytoplasmic transport of influenza A  
1035 virus viral RNA. *J Virol.* 2011 May;85(9):4143–56.
- 1036 103. Moskovich O, Fishelson Z. Quantification of complement C5b-9 binding to cells by  
1037 flow cytometry. *Methods Mol Biol Clifton NJ.* 2014;1100:103–8.
- 1038 104. Durkin ME, Qian X, Popescu NC, Lowy DR. Isolation of Mouse Embryo  
1039 Fibroblasts. *Bio-Protoc.* 2013 Sep 20;3(18).
- 1040 105. Hoffmann E, Neumann G, Kawaoka Y, Hobom G, Webster RG. A DNA transfection  
1041 system for generation of influenza A virus from eight plasmids. *Proc Natl Acad Sci U S A.*  
1042 2000 May 23;97(11):6108–13.
- 1043 106. James J, Howard W, Iqbal M, Nair VK, Barclay WS, Shelton H. Influenza A virus  
1044 PB1-F2 protein prolongs viral shedding in chickens lengthening the transmission window.  
1045 *J Gen Virol.* 2016 Oct;97(10):2516–27.
- 1046 107. Bialy D, Shelton H. Functional neuraminidase inhibitor resistance motifs in avian  
1047 influenza A(H5Nx) viruses. *Antiviral Res.* 2020 Oct;182:104886.
- 1048 108. Chang P, Sealy JE, Sadeyen J-R, Bhat S, Lukosaityte D, Sun Y, et al. Immune  
1049 Escape Adaptive Mutations in the H7N9 Avian Influenza Hemagglutinin Protein Increase  
1050 Virus Replication Fitness and Decrease Pandemic Potential. *J Virol.* 2020 Sep 15;94(19).
- 1051 109. de Wit E, Spronken MIJ, Vervaet G, Rimmelzwaan GF, Osterhaus ADME, Fouchier  
1052 RAM. A reverse-genetics system for Influenza A virus using T7 RNA polymerase. *J Gen*  
1053 *Virol.* 2007 Apr;88(Pt 4):1281–7.
- 1054 110. de Wit E, Spronken MIJ, Bestebroer TM, Rimmelzwaan GF, Osterhaus ADME,  
1055 Fouchier RAM. Efficient generation and growth of influenza virus A/PR/8/34 from eight  
1056 cDNA fragments. *Virus Res.* 2004 Jul;103(1–2):155–61.
- 1057
- 1058

1059

### **Author contributions**

1060

1061           Conceptualization: NBS, ZEVS, MJA; Funding acquisition: MJA; Investigation:  
1062 NBS, ZEVS, CG, CAR; Supervision: MJA; Visualization: NBS, ZEVS, MJA; Writing: NBS,  
1063 ZEVS, MJA.

1064

1065

### **Acknowledgements**

1066

1067           We acknowledge Dr. Colin Adrain (IGC, Portugal), Dr. Holly Shelton (The Pirbright  
1068 Institute, UK), Dr. Jonathan Yewdell (NIAID, USA), Dr. Luís Moita (IGC, Portugal), Dr.  
1069 Miguel Soares (IGC, Portugal), Prof. Paul Digard (Roslin Institute, UK), Dr. Ron Fouchier  
1070 (Erasmus, Netherlands), Dr. Vera Martins and Prof. Wen-Chao Song (University of  
1071 Pennsylvania, USA) for providing mice, cells and reagents. We are grateful to the Animal  
1072 House Facility, Flow Cytometry Facility and Histopathology Unit at the IGC for technical  
1073 support, sample processing and data collection. We thank André Barros (IGC Portugal),  
1074 Dr. Mónica Bettencourt-Dias (IGC, Portugal), Dr. Gabriel Nuñez (University of Michigan)  
1075 and the members of CBV lab for helpful discussion.

1076

1077

## Figure and table legends

1078

1079

### **Fig. 1 – Decay-accelerating factor (DAF) aggravates IAV infection *in vivo*.**

1080

**A, B:** Bodyweight loss (**A**) and mortality (**B**) of C57BL/6J WT or *Daf*<sup>-/-</sup> mice infected

1081

with 1000 PFU of A/California/7/2009 (Cal) (Inf n = 8; mock n = 3 for per group) **C, D:**

1082

Bodyweight loss (**C**) and mortality (**D**) of C57BL/6J WT or *Daf*<sup>-/-</sup> mice infected with 1000

1083

PFU of A/England/195/2009 (Eng) (Inf n = 9 per group; mock n = 5 and n = 4 for WT and

1084

*Daf*<sup>-/-</sup> respectively). Results are expressed as mean±sd, statistical analysis detailed in

1085

materials and methods.

1086

1087

**Fig. 2 – *Daf*<sup>-/-</sup> mice are protected against PR8-HK4,6, but not PR8, and protection is specific of this RCA.**

1088

1089

**A, B:** Bodyweight loss (**A**) and mortality (**B**) of C57BL/6J WT or *Daf*<sup>-/-</sup> mice infected

1090

with the indicated doses of A/Puerto Rico/8/1934 (PR8) (**A:** Inf n = 8 per group; mock n = 7

1091

and n = 4 for WT and *Daf*<sup>-/-</sup> respectively; **B:** Inf n = 9 and n = 10, mock n = 8 and n = 4 for

1092

WT and *Daf*<sup>-/-</sup> respectively). **C, D:** Bodyweight loss (**C**) and mortality (**D**) of C57BL/6J WT

1093

or *Daf*<sup>-/-</sup> mice infected with the indicated doses of A/X-31 (PR8-HK4,6) (**C:** Inf n = 9 and n =

1094

10, mock n = 8 and n = 4 for WT and *Daf*<sup>-/-</sup> respectively; **D:** Inf n = 7 and n = 8, mock n = 3

1095

and n = 2 for WT and *Daf*<sup>-/-</sup> respectively). **E, F:** Bodyweight loss (**E**) and mortality (**F**) of

1096

C57BL/6J WT or *Cd59*<sup>-/-</sup> mice infected with the indicated doses of PR8-HK4,6 (**E:** Inf n =

1097

10 and n = 11 for WT and *Daf*<sup>-/-</sup> respectively, mock = 7 per group; **F:** Inf n = 10 per group,

1098

mock n = 4 and n = 7 for WT and *Daf*<sup>-/-</sup> respectively). Results are expressed as mean±sd,

1099

statistical analysis detailed in materials and methods.

1100

1101

**Fig. 3 – DAF does not affect viral replication, clearance, or tissue penetration,**

1102

**but is an immunopathology instigator.**



1103           **A, B:** Lung viral titers of C57BL/6J WT or *Daf*<sup>-/-</sup> mice infected with 1000 PFU of A/X-  
1104 31 (PR8HK4,6). Samples collected at 3 d.p.i. (**A**, n = 13 and n = 14 for WT and *Daf*<sup>-/-</sup>  
1105 respectively) and 6 d.p.i. (**B**, n = 18 and n = 19 for WT and *Daf*<sup>-/-</sup> respectively). **C:**  
1106 Immunohistochemistry detection of IAV nucleoprotein (NP) in WT or *Daf*<sup>-/-</sup> mice 3 d.p.i. with  
1107 1000 PFU of PR8HK4,6 (+ healthy; + infected). **D:** Quantification of infected bronchioli (n =  
1108 6 per group). **E, F:** Histological score of C57BL/6J WT or *Daf*<sup>-/-</sup> mice infected with 1000  
1109 PFU of PR8HK4,6 was assessed blindly. Evaluated parameters detailed in Table S1.  
1110 Samples collected at 3 d.p.i. (**E**, n = 11 and n = 10 for WT and *Daf*<sup>-/-</sup> respectively) and 6  
1111 d.p.i. (**F**, n = 15 per group). Results are expressed as mean±sd. Statistical analysis  
1112 detailed in materials and methods.

1113

1114           **Fig. 4 – *Daf*<sup>-/-</sup> mice have reduced complement activation and recruitment of**  
1115 **innate immune cells.**

1116           **A:** Bodyweight loss of C57BL/6J WT, *C3*<sup>-/-</sup> or *C3*<sup>-/-</sup> / *Daf*<sup>-/-</sup> mice infected with 500  
1117 PFU of A/X-31 (PR8-HK4,6) (Inf n = 10, n = 6 and n = 10, mock n = 5, n = 5 and n = 7 for  
1118 WT, *C3*<sup>-/-</sup> and *C3*<sup>-/-</sup> / *Daf*<sup>-/-</sup> respectively). Results are expressed as mean±sd. **B:** C3a levels  
1119 in BALs of C57BL/6J WT (n = 7) or *Daf*<sup>-/-</sup> (n = 8) mice 6 d.p.i. with 1000 PFU of PR8-  
1120 HK4,6. Results are expressed as mean±sd. **C:** Cell death of primary lung cells derived  
1121 from WT or *Daf*<sup>-/-</sup> mice infected or mock-infected with PR8-HK4,6 and treated with serum.  
1122 Results are expressed as mean±sd from 3 replicates from 2 independent experiments. **D,**  
1123 **E, F:** Analysis of NK cells (**D**, n = 6 and n = 3 for WT and *Daf*<sup>-/-</sup> respectively), neutrophils  
1124 (**E**, n = 11 and n = 10 for WT and *Daf*<sup>-/-</sup> respectively) and monocytes (**F**, n = 11 and n = 10  
1125 for WT and *Daf*<sup>-/-</sup> respectively) levels in BALs of WT or *Daf*<sup>-/-</sup> mice, 3 d.p.i. with 1000 PFU  
1126 PR8-HK4,6. Results are expressed as mean±sd. **G, H, I, J, K:** Analysis of neutrophils (**G**),  
1127 monocytes (**H**), CD4<sup>+</sup> T cells (**I**), CD8<sup>+</sup> T cells (**J**) and IFN-γ (**K**) levels in BALs of WT or

1128 *Daf*<sup>-/-</sup> mice, 6 d.p.i. with 1000 PFU PR8-HK4,6 (n = 10 per group). Results are expressed  
1129 as mean±sd. Statistical analysis detailed in materials and methods.

1130

1131 **Fig. 5 – DAF interaction with HA worsens disease outcome, without**  
1132 **increasing immunopathology.**

1133 **A, B:** Bodyweight loss (**A**) and mortality (**B**) of C57BL/6J WT or *Daf*<sup>-/-</sup> mice infected  
1134 with the indicated doses of A/Puerto Rico/8/1934 with segment 6 from A/Hong Kong/1/68  
1135 (PR8-HK6). (**A:** Inf n = 16 and n = 18, mock n = 6 and n = 7 for WT and *Daf*<sup>-/-</sup> respectively;  
1136 **B:** Inf n = 12 and n = 9, mock n = 4 and n = 2 for WT and *Daf*<sup>-/-</sup> respectively). Results are  
1137 expressed as mean±sd. **C, D:** Lung viral titers of C57BL/6J WT or *Daf*<sup>-/-</sup> mice infected with  
1138 20 PFU of PR8-HK6. Samples collected at 3 d.p.i. (**C**) and 6 d.p.i. (**D**) (n = 10 and n = 7 for  
1139 WT and *Daf*<sup>-/-</sup> respectively). **E:** Immunohistochemistry detection of IAV nucleoprotein (NP)  
1140 in WT or *Daf*<sup>-/-</sup> 3 d.p.i. with 20 PFU of PR8-HK6 (+ healthy; + infected). **F:** Quantification of  
1141 infected bronchioli (n = 5 per group). **G, H:** Histological score of C57BL/6J WT or *Daf*<sup>-/-</sup>  
1142 mice infected with 20 PFU of PR8HK-6. Samples collected at 3 d.p.i. (**E**, n = 10 and n = 7  
1143 for WT and *Daf*<sup>-/-</sup> respectively) and 6 d.p.i. (**F**, n = 10 and n = 8 for WT and *Daf*<sup>-/-</sup>  
1144 respectively). Results are expressed as mean±sd. Statistical analysis detailed in materials  
1145 and methods.

1146

1147 **Fig. 6 – *Daf*<sup>-/-</sup> mice have reduced complement activation and T cell**  
1148 **recruitment upon PR8-HK6 infection.**

1149 **A:** Bodyweight loss of C57BL/6J WT *C3*<sup>-/-</sup> or *C3*<sup>-/-</sup> / *Daf*<sup>-/-</sup> mice infected with 20 PFU  
1150 of A/Puerto Rico/8/1934 with segment 6 from A/Hong Kong/1/68 (PR8-HK6) (Inf n = 10, n  
1151 = 10 and n = 4, mock n = 4, n = 3 and n = 1, for WT, *C3*<sup>-/-</sup> and *C3*<sup>-/-</sup> / *Daf*<sup>-/-</sup> respectively).  
1152 Results are expressed as mean±sd. **B:** C3a levels in BALs of C57BL/6J WT (n = 10) or  
1153 *Daf*<sup>-/-</sup> (n = 8) mice 6 d.p.i. with 20 PFU of PR8-HK6. Results are expressed as mean±sd. **C,**

1154 **D:** Analysis of neutrophils (**C**) and monocytes (**D**) levels in BALs of WT (n = 7) or *Daf*<sup>-/-</sup> (n =  
1155 6) mice, 3 d.p.i. with 10 PFU PR8-HK6. Results are expressed as mean±sd. **E, F, G, H:**  
1156 Analysis of neutrophils (**E**), monocyte (**F**), CD4<sup>+</sup> T cells (**G**) and CD8<sup>+</sup> T cells (**H**) levels in  
1157 BALs of WT (n = 10) or *Daf*<sup>-/-</sup> (n = 8) mice, 6 d.p.i. with 20 PFU PR8-HK6. Results are  
1158 expressed as mean±sd. Statistical analysis detailed in materials and methods.

1159

1160 **Fig. 7 – DAF interaction with NA modulates immunopathology.**

1161 **A, B:** Bodyweight loss (**A**) and mortality (**B**) of C57BL/6J WT or *Daf*<sup>-/-</sup> mice infected  
1162 with the indicated doses of A/Puerto Rico/8/1934 with segment 4 from A/Hong Kong/1/68  
1163 (PR8-HK4). (**A:** Inf n = 14 and n = 10, mock n = 4 and n = 1 for WT and *Daf*<sup>-/-</sup> respectively;  
1164 **B:** Inf n = 8 per group, mock n = 4 and n = 1 for WT and *Daf*<sup>-/-</sup> respectively). Results are  
1165 expressed as mean±sd. **C, D:** Lung viral titers of C57BL/6J WT or *Daf*<sup>-/-</sup> mice infected with  
1166 100 PFU of PR8-HK4. Samples collected at 3 d.p.i. (**C**, n = 9 and n = 8 for WT and *Daf*<sup>-/-</sup>  
1167 respectively) and 6 d.p.i. (**D**, n = 9 per group). Results are expressed as mean±sd. **E:**  
1168 Immunohistochemistry detection of IAV nucleoprotein (NP) in WT or *Daf*<sup>-/-</sup> 3 d.p.i. with 100  
1169 PFU of PR8-HK4 (+ healthy; + infected). **F:** Quantification of infected bronchioli (n = 5 per  
1170 group). **G, H:** Histological score of C57BL/6J WT or *Daf*<sup>-/-</sup> mice infected with 100 PFU of  
1171 PR8-HK4. Samples collected at 3 d.p.i. (**G**, Inf n = 16 and n = 18, mock n = 6 and n = 7 for  
1172 WT and *Daf*<sup>-/-</sup> respectively) and 6 d.p.i. (**H**, Inf n = 13 and n = 9, mock n = 4 and n = 2 for  
1173 WT and *Daf*<sup>-/-</sup> respectively). Results are expressed as mean±sd. Statistical analysis  
1174 detailed in materials and methods.

1175

1176 **Fig. 8 – *Daf*<sup>-/-</sup> mice present lower complement activation and neutrophil**  
1177 **recruitment at 3 d.p.i. upon PR8-HK4 infection.**

1178 **A:** Bodyweight loss of C57BL/6J WT *C3*<sup>-/-</sup> or *C3*<sup>-/-</sup> / *Daf*<sup>-/-</sup> mice infected with 100  
1179 PFU of A/Puerto Rico/8/1934 with segment 4 from A/Hong Kong/1/68 (PR8-HK4) (Inf n =

1180 14, n = 10, and n = 3, mock n = 4, n = 3 and n = 1 for WT, *C3<sup>-/-</sup>* and *C3<sup>-/-</sup> / Daf<sup>-/-</sup>*  
1181 respectively). Results are expressed as mean±sd. **B**: C3a levels in BALs of C57BL/6J WT  
1182 or *Daf<sup>-/-</sup>* mice 6 d.p.i. with 100 PFU of PR8-HK4 (n = 9 per group). Results are expressed  
1183 as mean±sd. **C, D**: Analysis of neutrophils (**C**) and monocytes (**D**) levels in BALs of WT or  
1184 *Daf<sup>-/-</sup>* mice, 3 d.p.i. with 100 PFU PR8-HK4 (n = 6 per group). Results are expressed as  
1185 mean±sd. **E, F, G, H**: Analysis of neutrophils (**E**), monocyte (**F**), CD4<sup>+</sup> T cells (**G**) and CD8<sup>+</sup>  
1186 T cells (**H**) levels in BALs of WT or *Daf<sup>-/-</sup>* mice, 6 d.p.i. with 100 PFU PR8-HK4 (n = 9 per  
1187 group). Results are expressed as mean±sd. Statistical analysis detailed in materials and  
1188 methods.

1189

1190 **Fig. 9 – Influenza A virus neuraminidase cleaves DAF through its sialidase**  
1191 **activity.**

1192 **A**: Western blot detection of complement decay-accelerating factor (DAF) in A549  
1193 cells upon infection with A/California/7/2009 (Cal), A/England/195/2009 (Eng), A/Puerto  
1194 Rico/8/1934 (PR8) or A/X-31 (PR8-HK4,6) at a multiplicity of infection (MOI) of 5. **B**: The  
1195 proportion of cleaved DAF was measured in each lane as the ratio of low molecular weight  
1196 (MW) to total DAF pixel densitometry. **C**: Western blot detection of DAF in mouse  
1197 embryonic fibroblasts (MEFs) derived from C57/BL6 WT or *Daf<sup>-/-</sup>* mice upon infection with  
1198 PR8 or PR8-HK4,6 at a MOI of 5. **D**: The proportion of cleaved DAF was measured in  
1199 each lane as the ratio of low MW to total DAF pixel densitometry. (**B, D**: data shown as  
1200 mean±sd, from three independent experiments). **E**: Western blot detection of DAF in  
1201 HEK293T cells after transfection with plasmids encoding the eight different PR8 viral  
1202 segments. **F**: Western blot detection of DAF in HEK293T cells transfected with eight  
1203 plasmids encoding each of the PR8 segments, including wild-type NA (WT) or the  
1204 catalytically-impaired mutant NA-E229A (E229A). **G**: Western blot detection of DAF in  
1205 A549 cells upon infection with PR8 at a MOI of 5, treated with Zanamivir. **H**: The

1206 proportion of cleaved DAF was measured in each lane as the ratio of low MW to total DAF  
1207 pixel densitometry (data shown as mean±sd, from four independent experiments.) **I:** Flow  
1208 cytometry detection of C5b-9 deposition in A549 cells after transduction with WT or  
1209 catalytically-impaired mutant NA-E229A and treatment with serum (data shown as  
1210 mean±sd, from six independent experiments, each corresponding to a pool of five  
1211 independent transductions. Each point represents the median fluorescence intensity (MFI)  
1212 of a sample treated with serum minus its corresponding heat-inactivated control.). **J:** DAF  
1213 was purified by immunoprecipitation from cell lysates of A549 cells infected with PR8 at 12  
1214 hours post-infection (h.p.i.), treated with PNGaseF and analyzed by western blot or lectin  
1215 blot with *Sambucus nigra* agglutinin (SNA) (\* indicates IgGs from immunoprecipitation).  
1216 Results are representative of three independent experiments. **K:** Western blot detection of  
1217 DAF in HEK293T cells after transfection with plasmids encoding NAs from the indicated  
1218 avian IAVs: H6N1 A/chicken/Taiwan/67/2013, H9N2 A/chicken/Pakistan/UDL-01/08, H5N2  
1219 A/goose/Taiwan/01031/2015, H5N6 A/chicken/Jiangxi/02.05 YGYXG023-P/2015, H4N6  
1220 A/chicken/Hunan/S1267/2010, H10N8 A/chicken/Jiangxi/1204/2014, H5N8 A/scarlet  
1221 ibis/Germany/Ar44-L01279/2015, H7N9 A/Anhui/1/2013.

1222 Yellow arrows indicate cleaved DAF. MW is indicated in kDa. Statistical analysis  
1223 detailed in materials and methods.

1224

1225 **Fig. 10 – Proposed model for DAF-mediated immunopathology.**

1226 At steady state, DAF accelerates the decay of C3 convertases, inhibiting the  
1227 formation of C3a and C3b and subsequent complement activation. Upon IAV infection, the  
1228 cell will produce viral proteins, and in particular NA. NA is a potent sialidase that will  
1229 remove the sialic acid content of DAF both in the cytoplasm and at the surface. This  
1230 processing of DAF by NA leads to DAF loss/alteration of function and hence overactivation  
1231 of the complement pathway that will recruit innate immune cells. The excess of innate

1232 immune response leads to tissue damage and ultimately immunopathology, worsening  
 1233 disease outcome.

1234

1235 **Fig. 1**

1236 **A**

1237

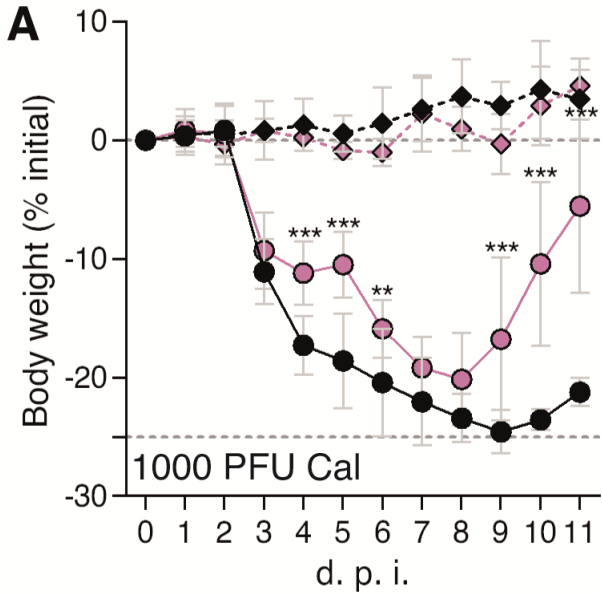

**B**

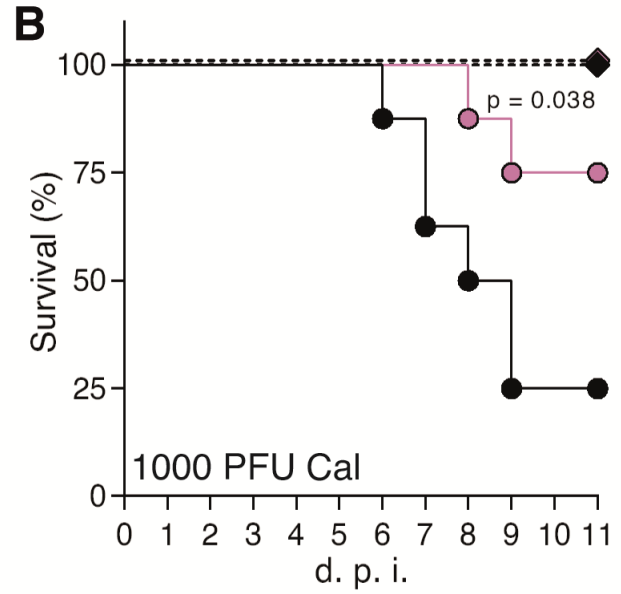

**C**

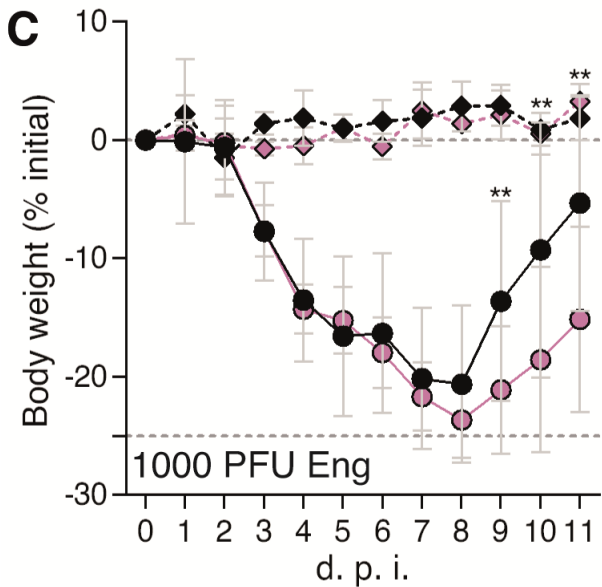

**D**

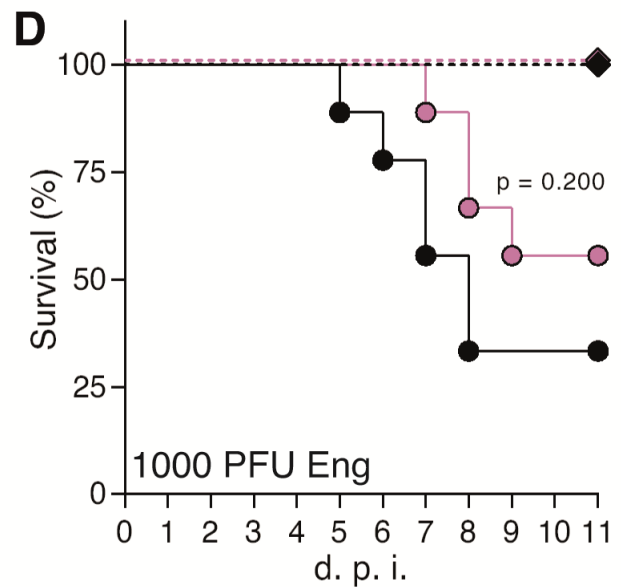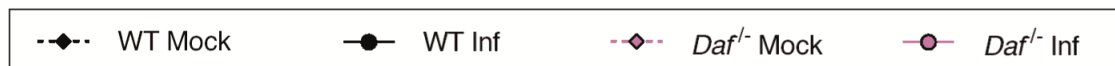

1238

**Fig. 2**

1239

1240

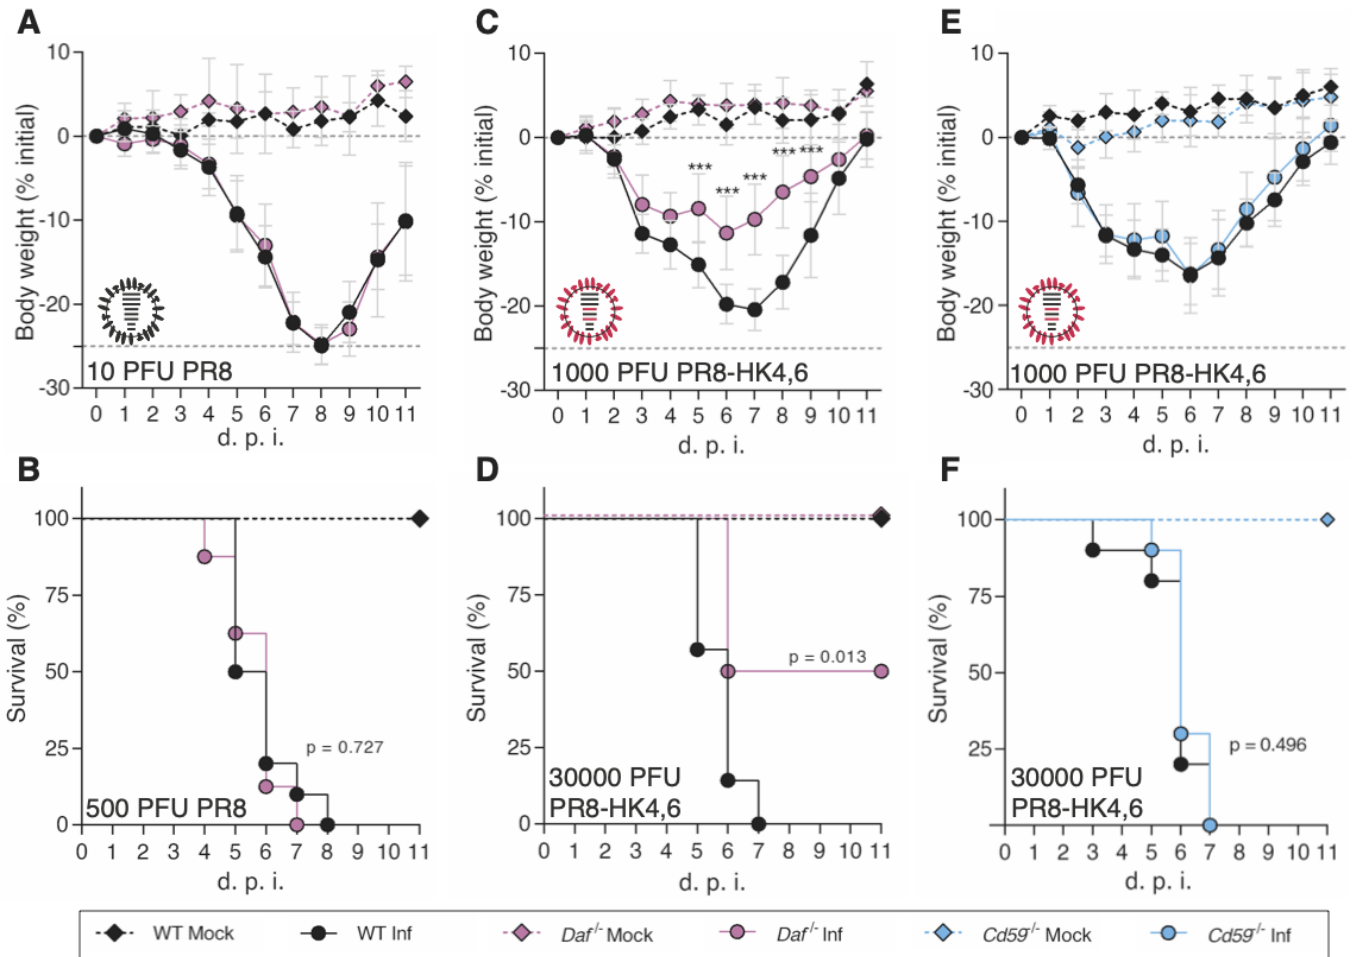

1241

**Fig. 3**

1242

1243

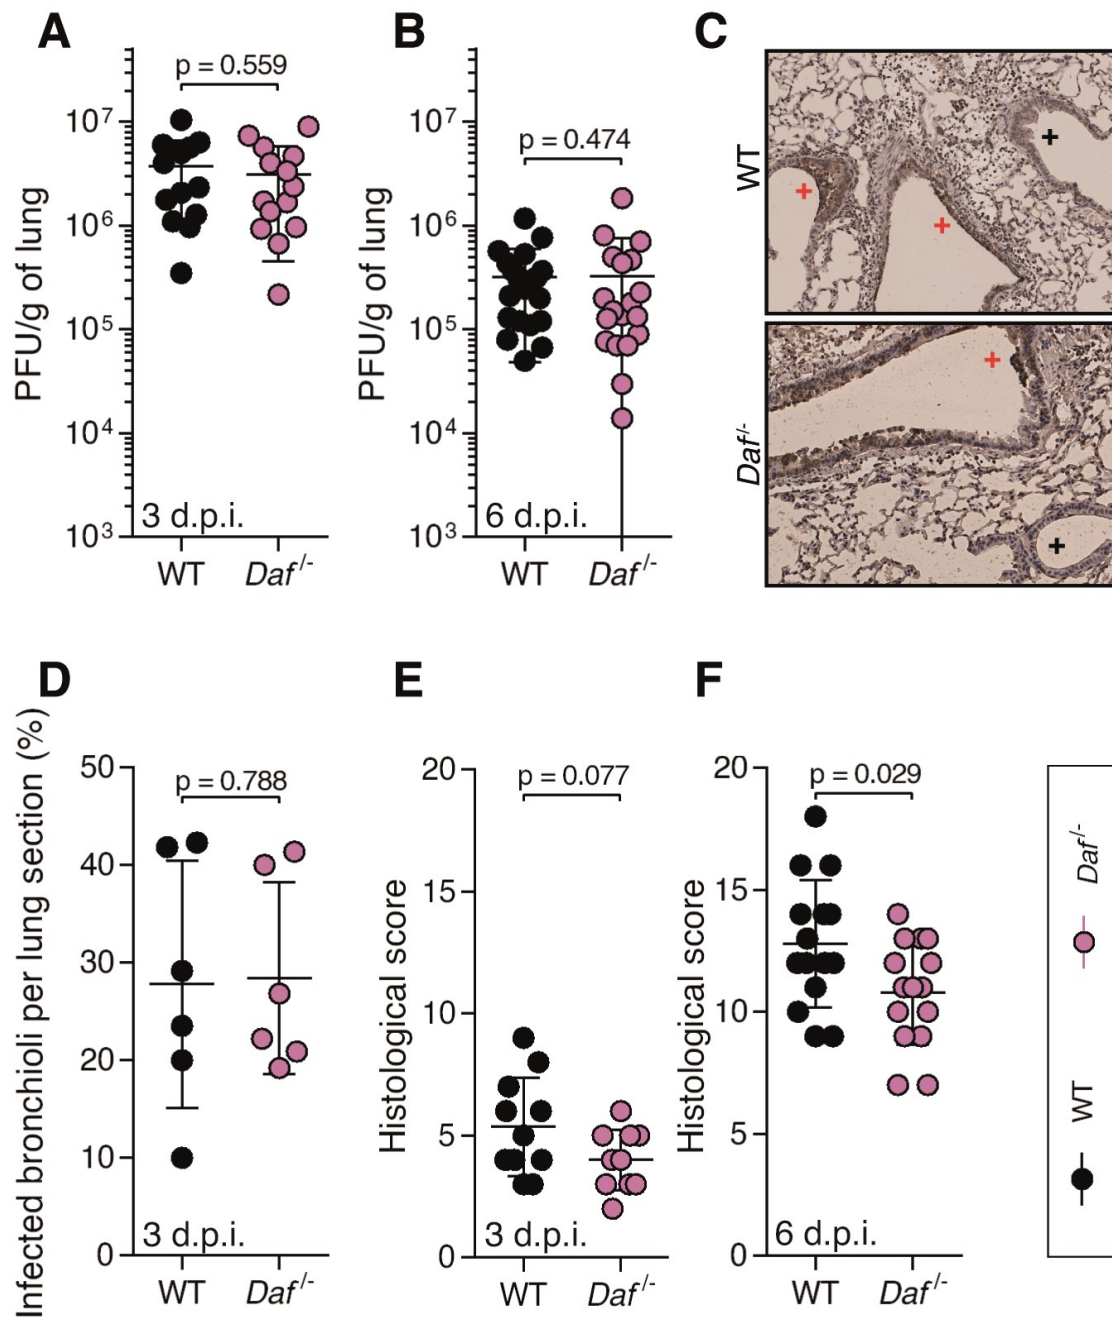



1244

**Fig. 4**

1245

1246

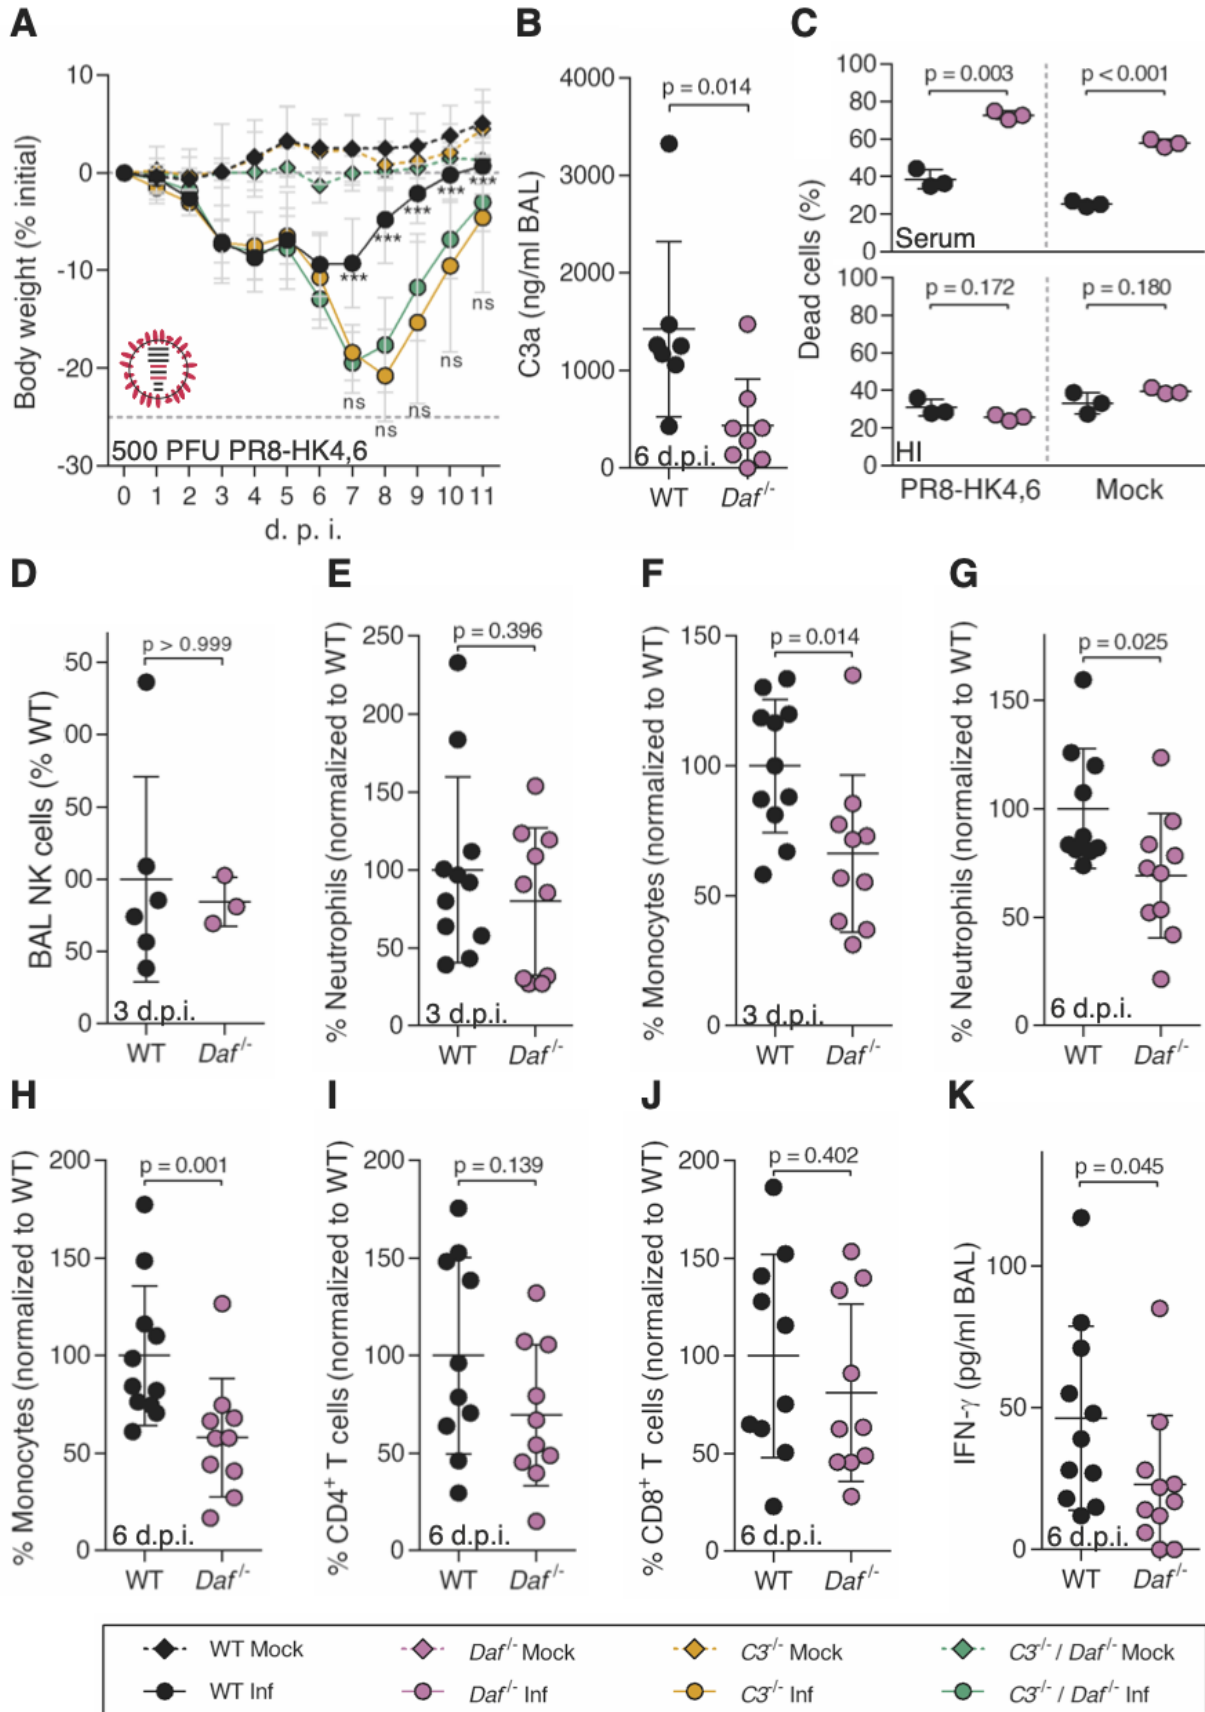

1247

**Fig. 5**

1248

1249

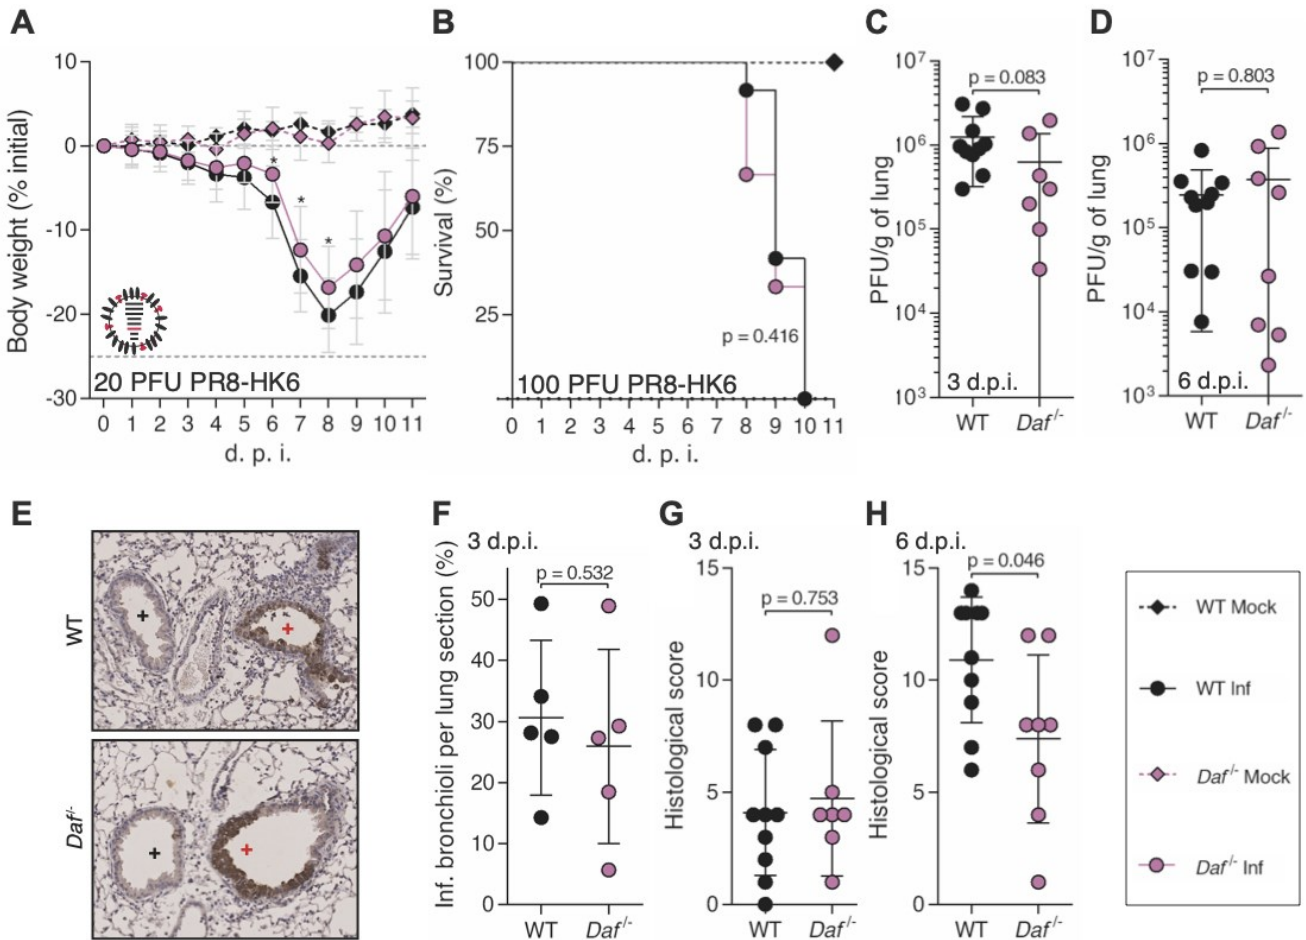

1250

**Fig. 6**

1251

1252

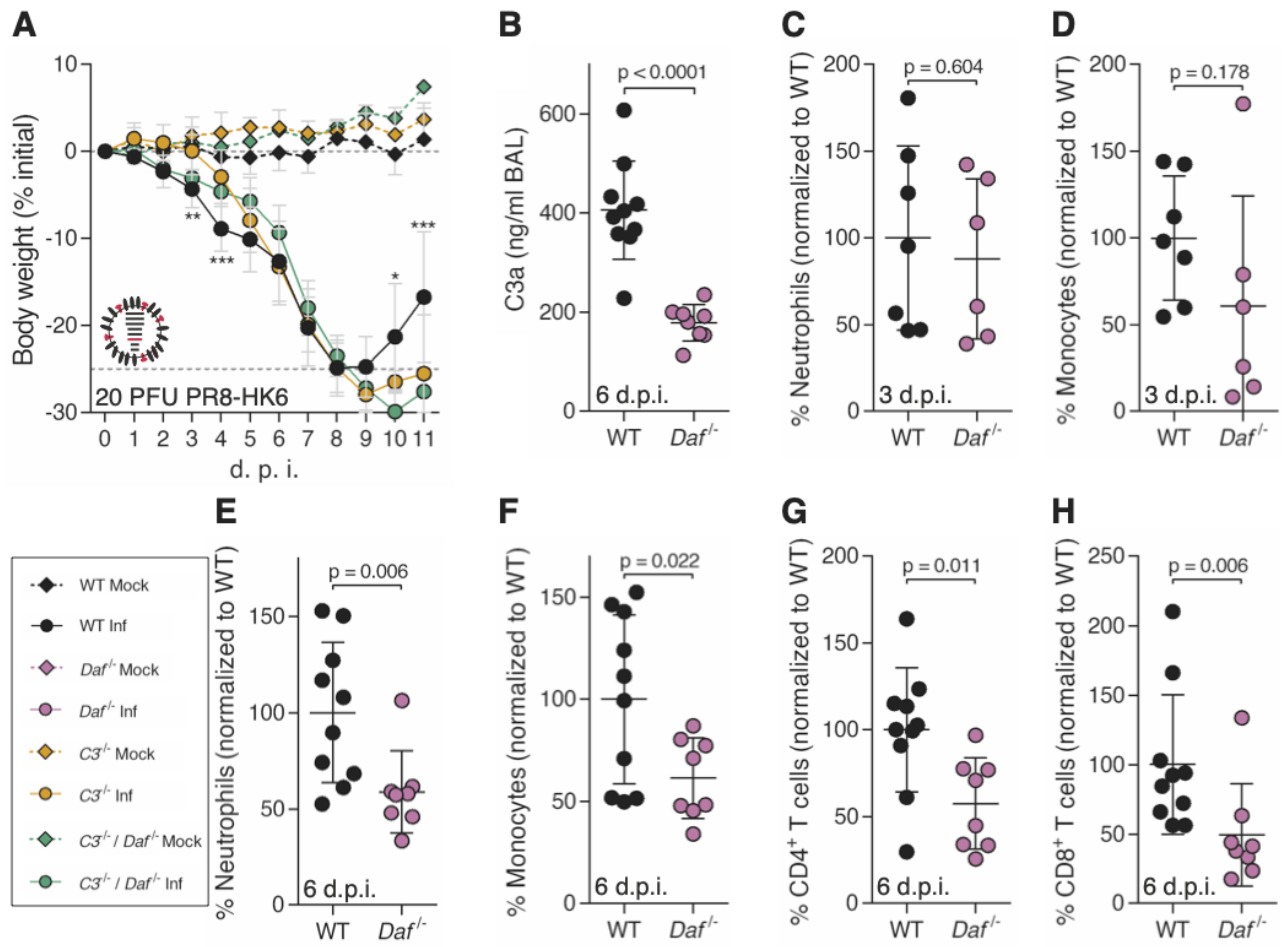

1253

**Fig. 7**

1254

1255

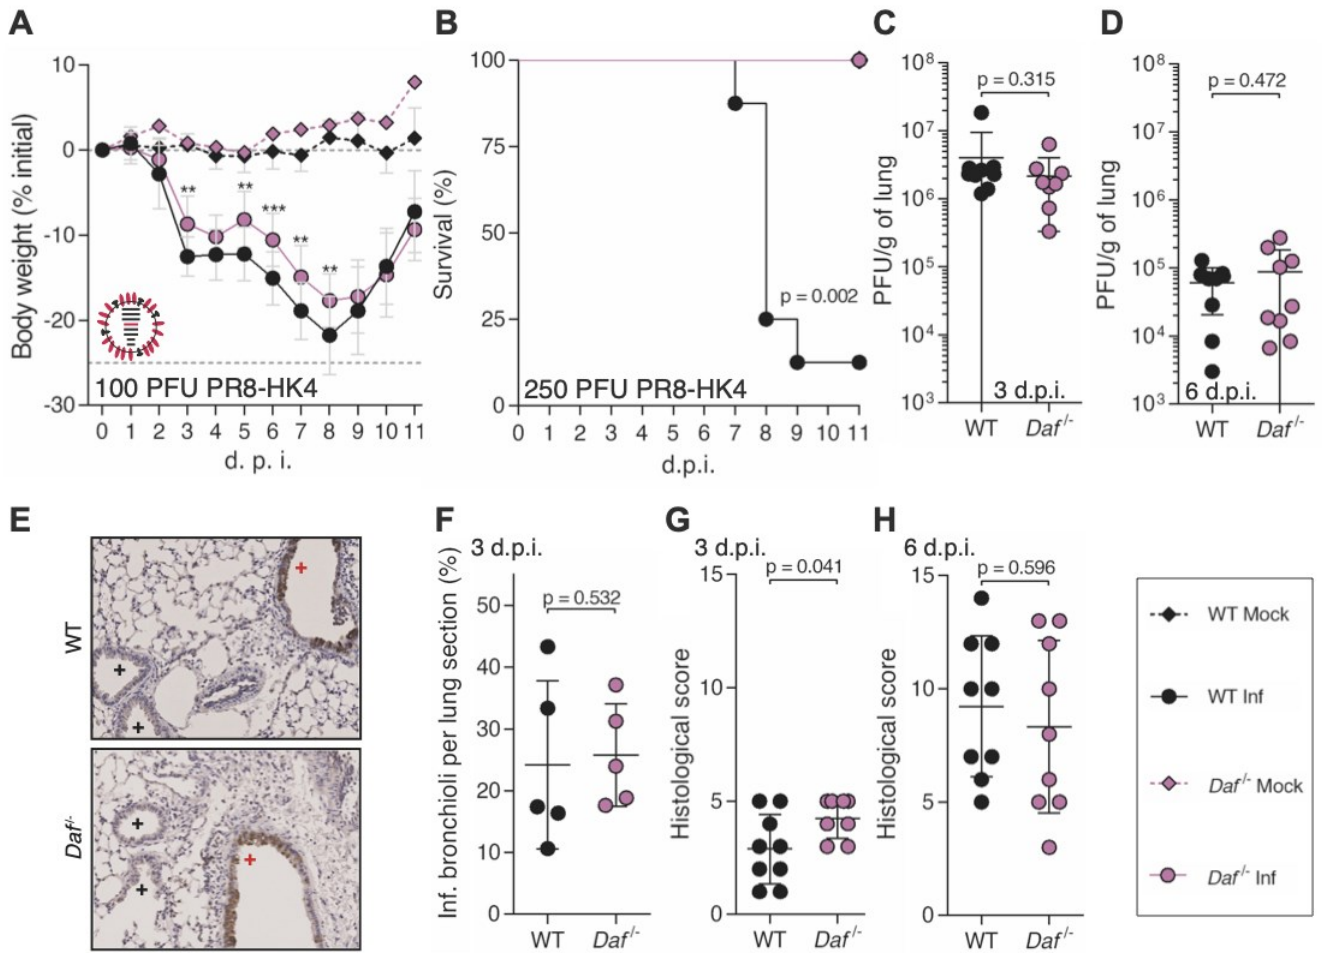

1256

**Fig. 8**

1257

1258

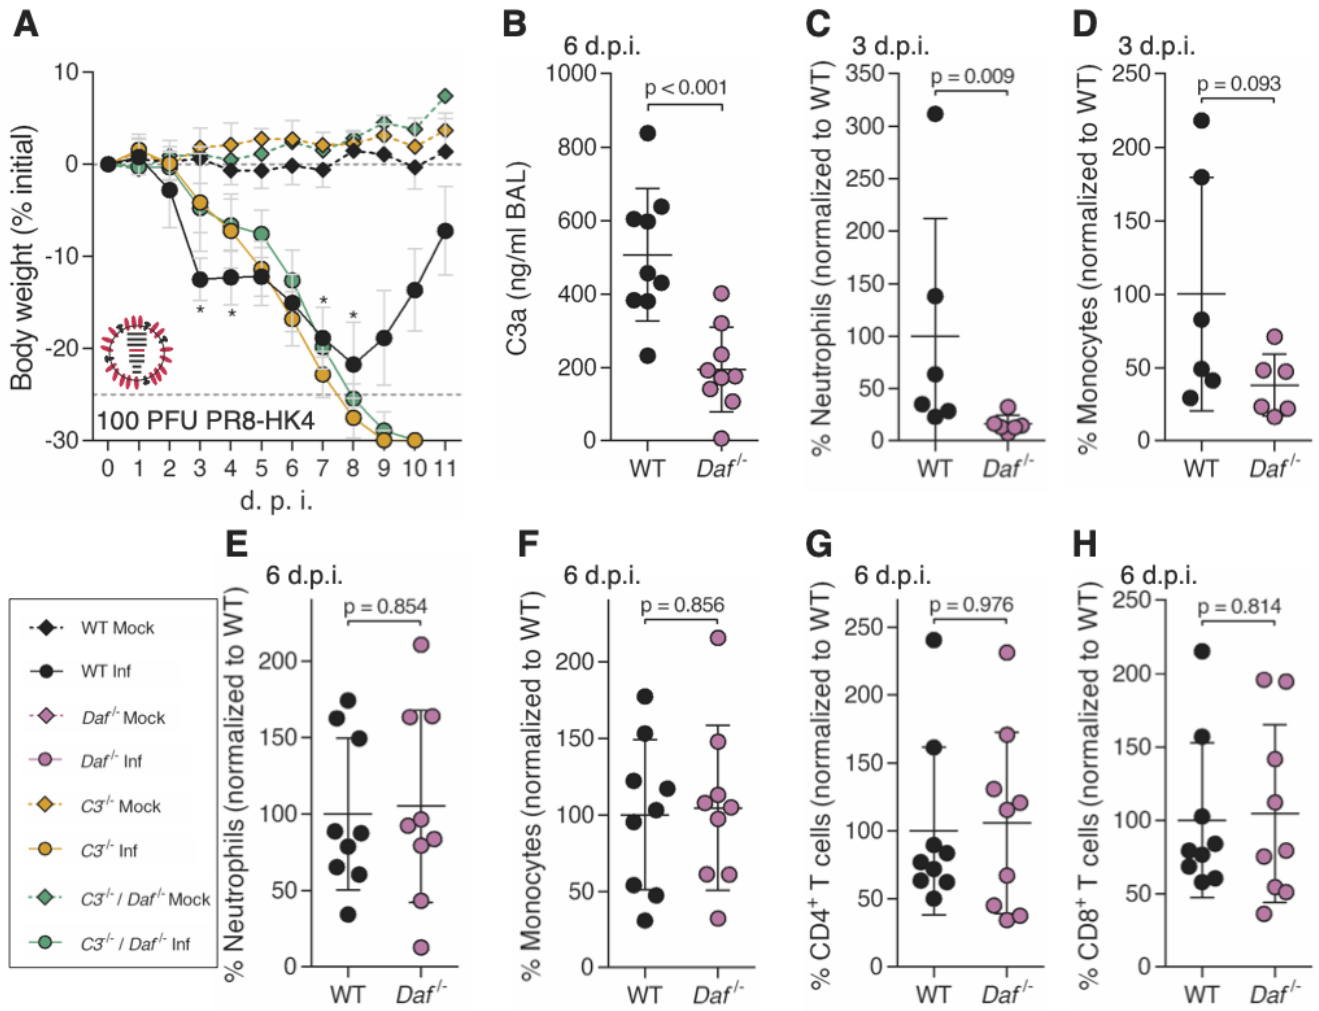

1259

**Fig. 9**

1260

1261

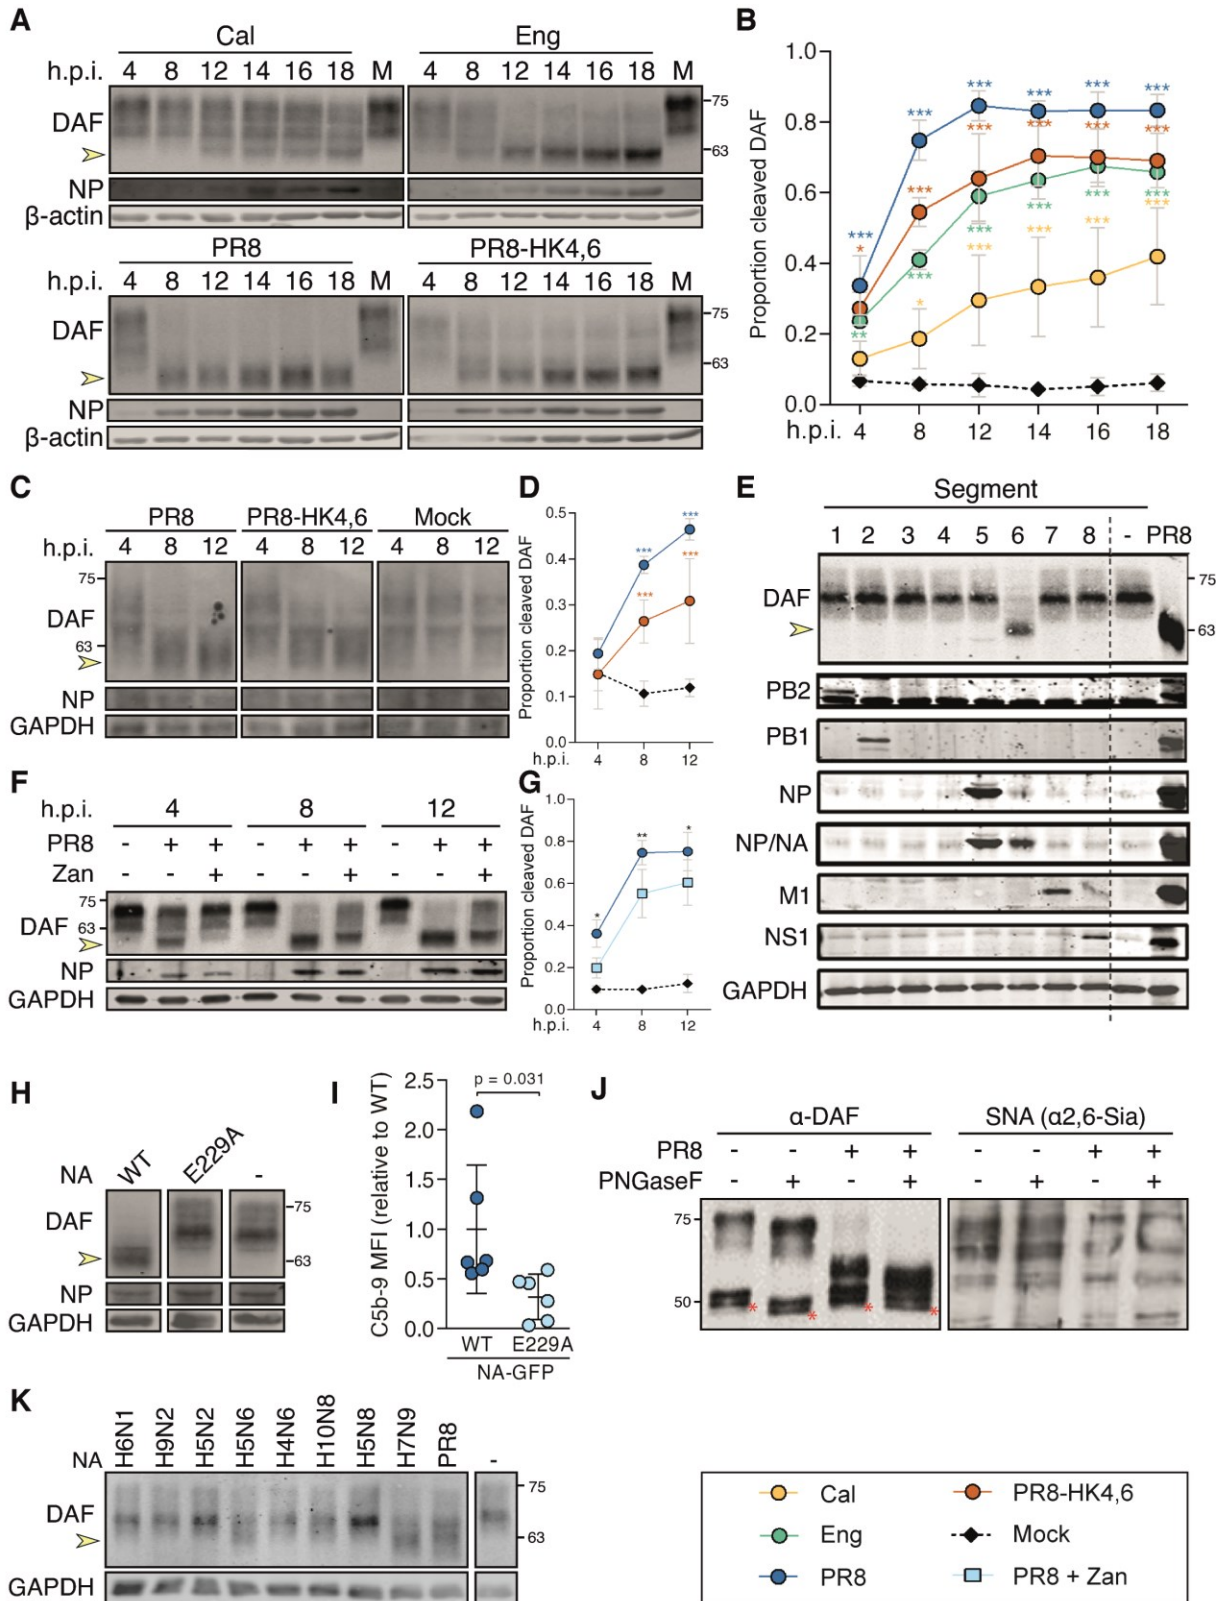

1262

**Fig. 10**

1263

1264

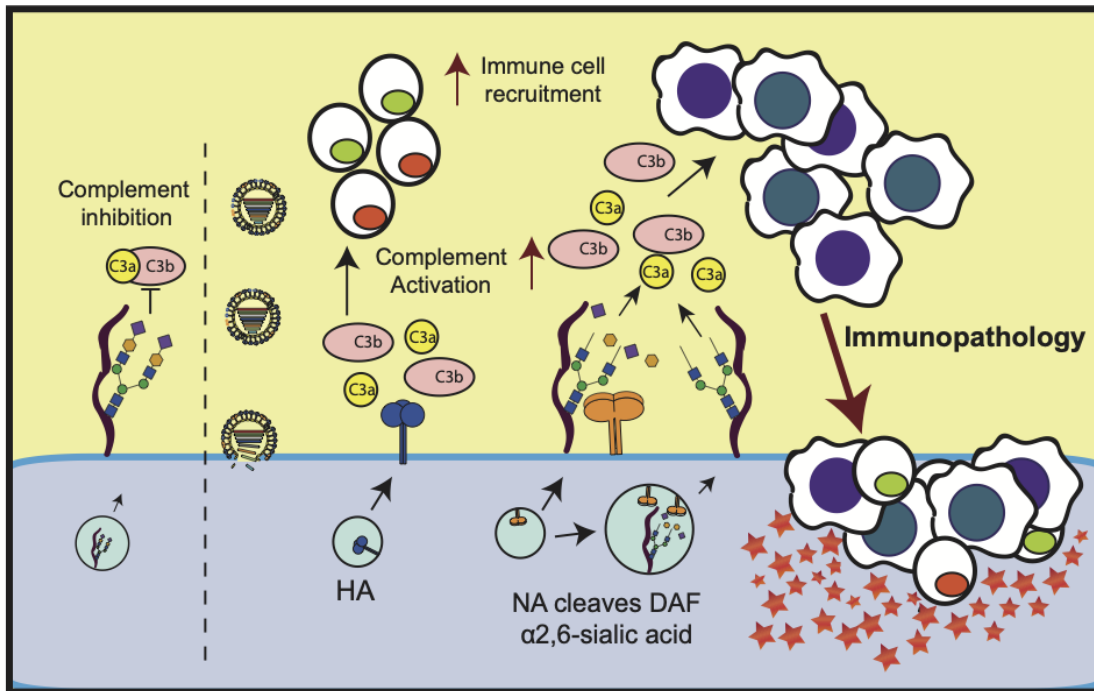

1265 **Supplementary material for Complement Decay-Accelerating Factor is a**  
1266 **modulator of influenza A virus lung immunopathology**

1267 Nuno Brito Santos<sup>1,6</sup>, Zoé Enderlin Vaz da Silva<sup>1,6</sup>, Catarina Gomes<sup>2,3</sup>, Celso A.  
1268 Reis<sup>2,3,4,5</sup> and Maria João Amorim<sup>1,\*</sup>

1269

1270 **The supplementary material includes 3 supplementary figures and 3 tables.**

1271

1272

1273

1274

1275

1276

1277

1278

1279

1280

1281

1282

1283

1284

1285

1286

1287

1288

1289

1290

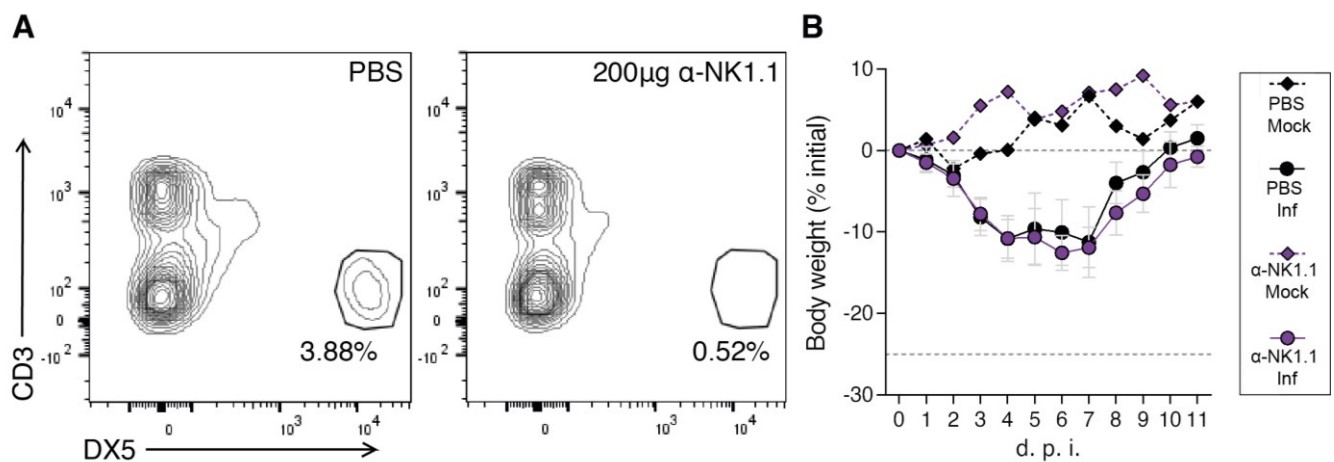

1282 **Fig. S1 – NK cell depletion does not alter disease outcome.**

1283 **A:** Representative flow cytometry detection of NK cells (gated in CD45<sup>+</sup> population)  
1284 in C57BL/6J WT 72 hours after depletion via intraperitoneal (IP) injection of α-NK1.1. **B:**  
1285 Bodyweight loss of C57BL/6J WT mice infected with 100 PFU of A/X-31 (PR8-HK4,6) and  
1286 depleted of NK cells by IP injection of α-NK1.1 every 72 hours, starting 72 hours before  
1287 infection (Inf n = 5 and mock n = 1 per group). Results are expressed as mean±sd.  
1288 Statistical analysis detailed in materials and methods.



1291

**Fig. S2**

1292

1293

1294

1295

1296

1297

1298

1299

1300

1301

1302

1303

1304

1305

1306

1307

1308

1309

1310

1311

1312

1313

1314

1315

1316

1317

1318

1319

1320

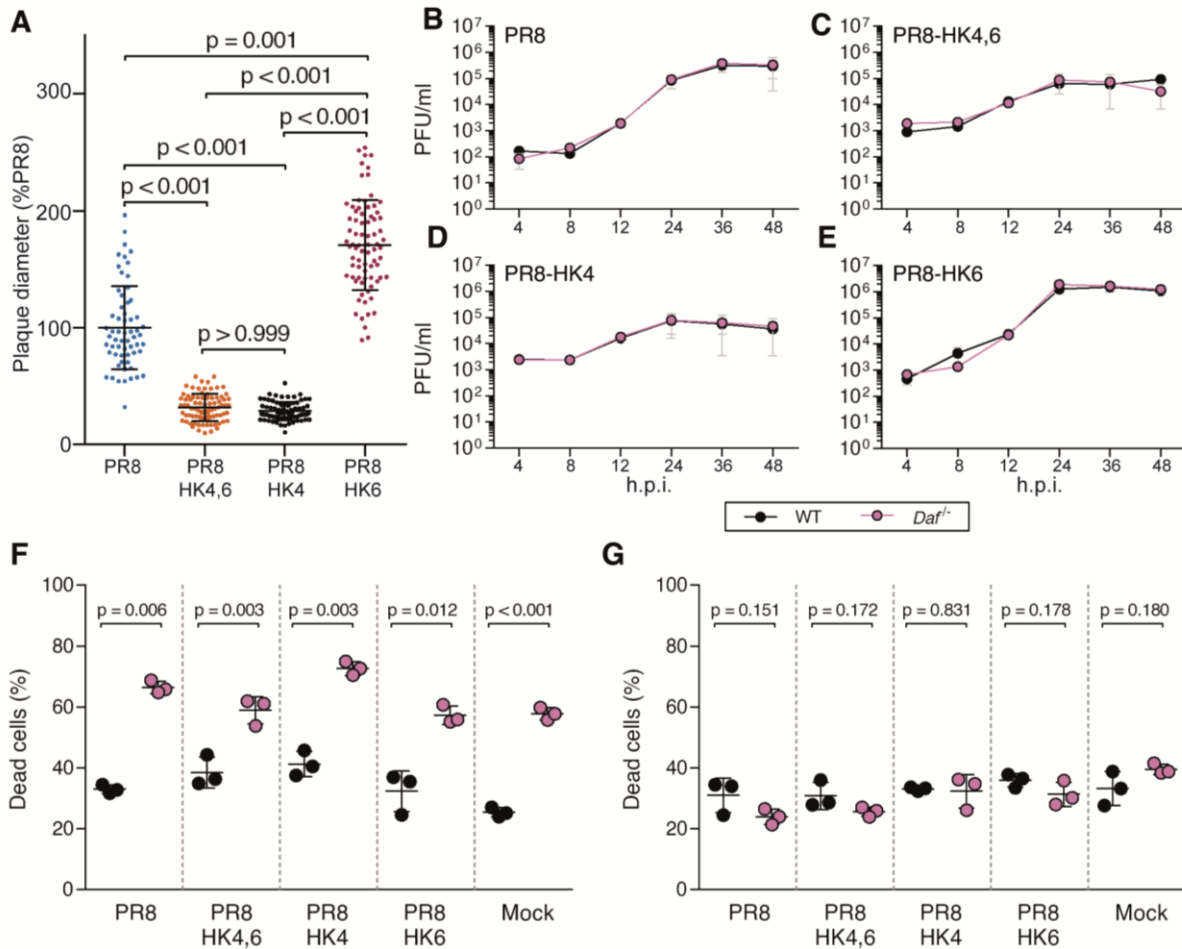

**Fig. S2 – DAF does not affect replication of PR8, PR8-HK4,6, PR8-HK4 and PR8-HK6.**

1320

**A:** Measurement of viral plaques diameter after infection of MDCK cells monolayers. Data shown as mean±sd from two independent experiments, each corresponding to six independent infections for each virus. Each point represents an individual plaque. **B-D:** Replication kinetics of A/Puerto Rico/8/1934 (PR8) (**B**), A/X-31 (PR8-HK4,6) (**C**), PR8 containing the segment 4 of A/Hong Kong/1/68 (HK68) (PR8-HK4) (**C**) and PR8 containing the segment 6 of HK68 (PR8-HK6) (**D**) in mouse embryonic fibroblasts (MEFs) derived from C57BL/6J WT or *Daf*<sup>-/-</sup> mice at multiplicity of infection (MOI) = 0.005. Data shown as mean±SEM, from two independent experiments. Statistical analysis detailed in materials and methods.

1328

1329

**Fig. S3**

1330

1331

1332

1333

1334

1335

1336

1337

1338

1339

1340

1341

1342

1343

1344

1345

1346

1347

1348

1349

1350

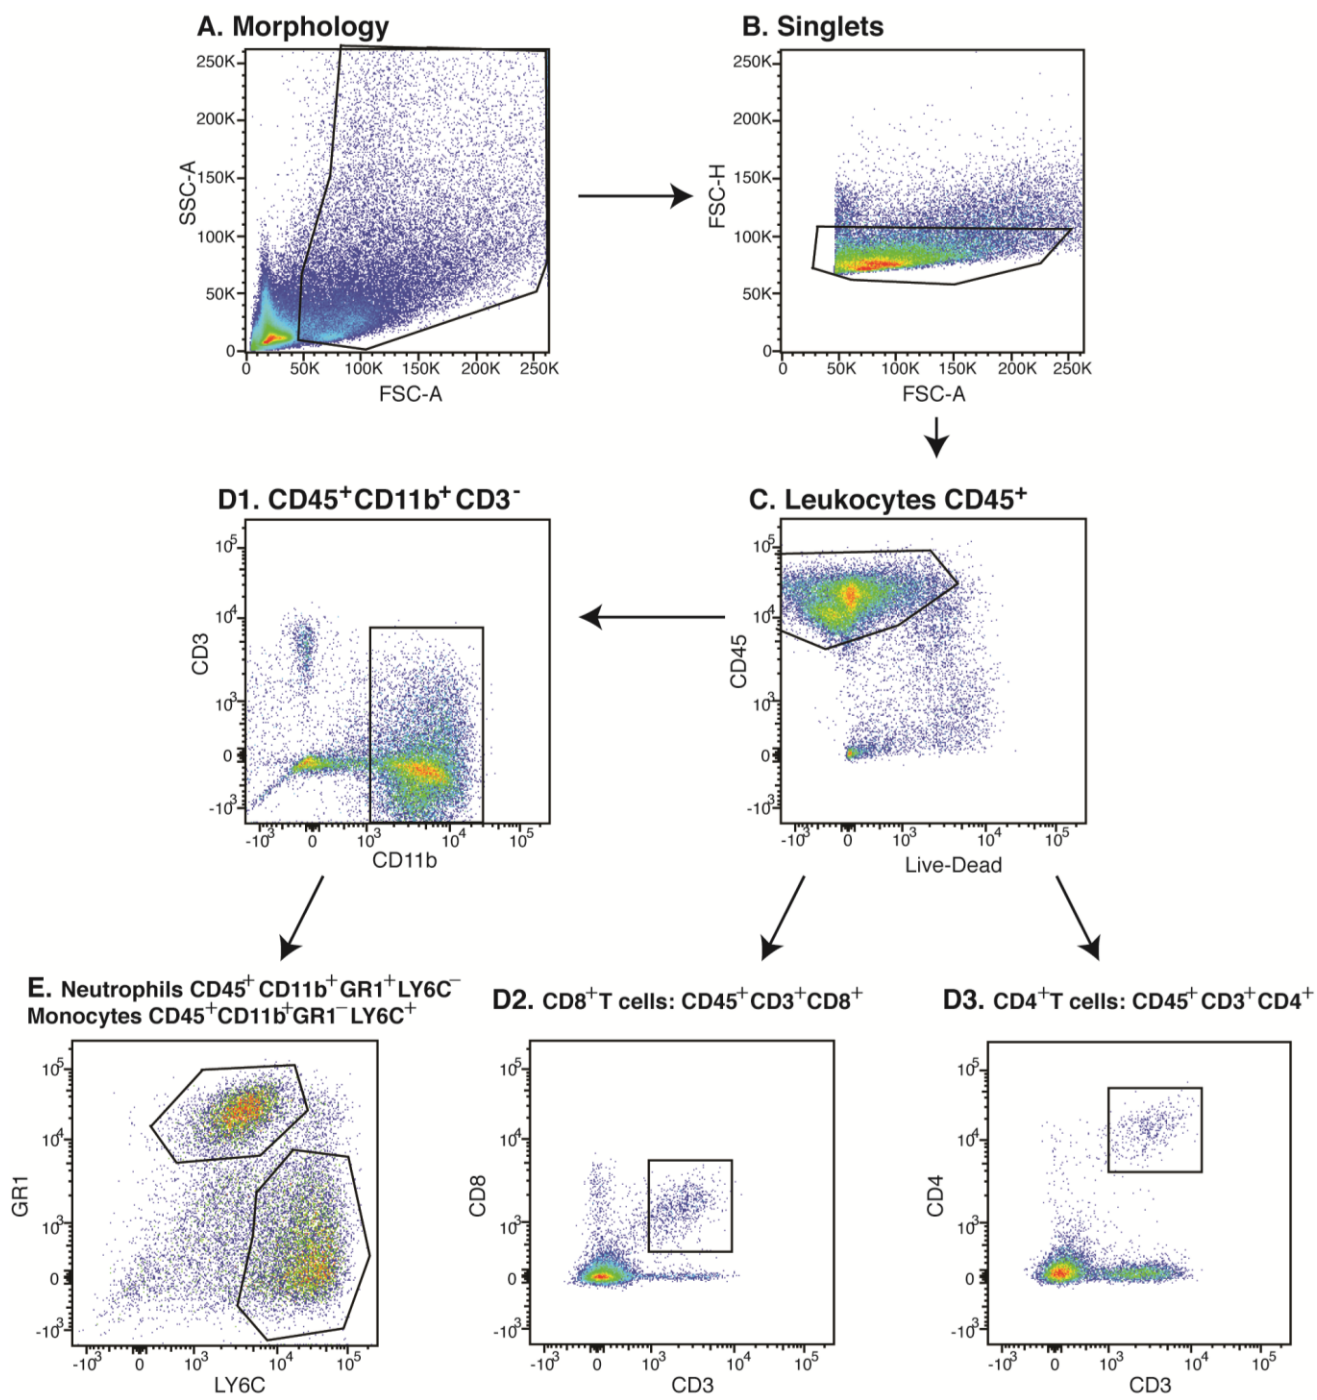

1351

**Fig. S3 – Representative flow cytometry gating strategy.**

1352

1353

1354

1355

**Table S1 - Histological scoring parameters.**

1356

1357

1358

| IAV   | CS7BL/6J                 | d.p.i. | Interstitial inflammation |     | Alveolar inflammation |     | Perivascular/peribronchial inflammation |     | Bronchial exsudates |     | Bronchial epithelium hyperplasia |     | Edema  |     |
|-------|--------------------------|--------|---------------------------|-----|-----------------------|-----|-----------------------------------------|-----|---------------------|-----|----------------------------------|-----|--------|-----|
|       |                          |        | median                    | IQR | median                | IQR | median                                  | IQR | median              | IQR | median                           | IQR | median | IQR |
|       | WT                       | 3      | 1                         | 0   | 0                     | 1   | 2                                       | 2   | 2                   | 2   | 0                                | 0   | 0      | 0   |
| PR8   |                          | 6      | 3                         | 1   | 3                     | 2   | 3                                       | 3   | 2                   | 1   | 2                                | 2   | 0      | 0   |
| HK4,6 | <i>Daf<sup>-/-</sup></i> | 3      | 1                         | 1   | 0                     | 0   | 2                                       | 2   | 1                   | 1   | 0                                | 0   | 0      | 0   |
|       |                          | 6      | 2                         | 1   | 2                     | 1   | 3                                       | 3   | 2                   | 1   | 2                                | 1   | 0      | 0   |
|       | WT                       | 3      | 0                         | 0   | 0                     | 0   | 1                                       | 1   | 1                   | 1   | 0                                | 0   | 0      | 0   |
| PR8   |                          | 6      | 3                         | 1   | 2                     | 1   | 3                                       | 3   | 1                   | 0   | 0                                | 0   | 0      | 0   |
| HK4   | <i>Daf<sup>-/-</sup></i> | 3      | 1                         | 1   | 0                     | 1   | 2                                       | 2   | 2                   | 1   | 0                                | 0   | 0      | 0   |
|       |                          | 6      | 1                         | 2   | 1                     | 2   | 3                                       | 3   | 1                   | 0   | 0                                | 0   | 0      | 0   |
|       | WT                       | 3      | 0                         | 0   | 0                     | 0   | 2                                       | 2   | 1                   | 1   | 0                                | 0   | 0      | 0   |
| PR8   |                          | 6      | 4                         | 1   | 4                     | 1   | 3                                       | 3   | 2                   | 2   | 0                                | 0   | 0      | 0   |
| HK6   | <i>Daf<sup>-/-</sup></i> | 3      | 1                         | 1   | 0                     | 0   | 3                                       | 2   | 1                   | 0   | 0                                | 0   | 0      | 0   |
|       |                          | 6      | 3                         | 2   | 3                     | 2   | 2                                       | 2   | 1                   | 1   | 0                                | 0   | 0      | 0   |

1359

**Table S2- Antibodies used in flow cytometry and western blot.**

1360

|                                  | Target | Brand                  | Catalog         | Clone    | Host | Diluted 1: |
|----------------------------------|--------|------------------------|-----------------|----------|------|------------|
| <b>Flow cytometry</b>            |        |                        |                 |          |      |            |
| CD11b/Mac1-BV605                 | Ms     | IGC Antibody Facility  | -               | M1/70    | Rt   | 100        |
| GR1/Ly-6G-PE                     | Ms     | BD Pharmingen          | 551461          | 1A8      | Rt   | 200        |
| Ly-6C-PerCPCy5.5                 | Ms     | eBioscience            | 45-5932-80      | HK1.4    | Rt   | 200        |
| CD3-FITC                         | Ms     | IGC Antibody Facility  | -               | AH       | Rt   | 100        |
| CD4-PE-Cy7                       | Ms     | IGC Antibody Facility  | -               | GK1.5    | Rt   | 100        |
| CD8-Pacific Blue                 | Ms     | IGC Antibody Facility  | -               | YTS169.4 | Rt   | 100        |
| CD45-APC                         | Ms     | BioLegend              | 103112          | 30-F11   | Rt   | 100        |
| CD49b/DX5-PE                     | Ms     | BioLegend              | 103506          | HMa2     | Ah   | 1600       |
| <b>WB - Primary antibodies</b>   |        |                        |                 |          |      |            |
| DAF                              | Ms     | R&D Systems            | AF5376          | Poly     | Sh   | 200        |
| DAF                              | Hu     | Abcam                  | ab133684        | EPR6689  | Rb   | 2000       |
| GAPDH                            | Hu/Ms  | Sicgen                 | AB0049          | Poly     | Gt   | 2000       |
| $\beta$ -actin                   | Hu     | Sigma-Aldrich          | A5441           | AC-15    | Ms   | 2000       |
| GFP                              | -      | Sicgen                 | AB0020          | Poly     | Gt   | 2000       |
| M1                               | IAV    | Abcam                  | ab20910         | Poly     | Gt   | 500        |
| NA                               | IAV    | R&D Systems            | AF4858          | Poly     | Sh   | 500        |
| NP                               | IAV    | Homemade*              | -               | Poly     | Rb   | 2000       |
| NS1                              | IAV    | Homemade*              | -               | Poly     | Rb   | 500        |
| PA                               | IAV    | Homemade*              | -               | Poly     | Rb   | 1000       |
| PB1                              | IAV    | Homemade*              | -               | Poly     | Rb   | 500        |
| PB2                              | IAV    | Homemade*              | -               | Poly     | Rb   | 200        |
| <b>WB - Secondary antibodies</b> |        |                        |                 |          |      |            |
| Goat IRDye 680RD                 | Gt     | LI-COR Biosciences     | 926-68074       | -        | Dk   | 10.000     |
| Goat IRDye 800CW                 | Gt     | LI-COR Biosciences     | 926-32214       | -        | Dk   | 10.000     |
| Mouse IgG IRDye 680RD            | Ms     | LI-COR Biosciences     | 926-68072       | -        | Dk   | 10.000     |
| Mouse IRDye 800CW                | Ms     | LI-COR Biosciences     | 926-32212       | -        | Dk   | 10.000     |
| Rabbit IRDye 800CW               | Rb     | LI-COR Biosciences     | 926-32213       | -        | Dk   | 10.000     |
| Rabbit IRDye 680RD               | Rb     | LI-COR Biosciences     | 926-68073       | -        | Dk   | 10.000     |
| Sheep Dylight™ 800               | Sh     | Rockland               | 613-445-002-0.5 | -        | Rb   | 10.000     |
| Rabbit Peroxidase AffiniPure     | Rb     | Jackson Immunoresearch | 111-035-144     | Poly     | Gt   | 25.000     |

\*hybridomas and homemade antibodies were provided by Dr. Jonathan Yewdell and Prof. Paul Digard, respectively

1361

1362

**Table S3 - Primers used for cloning and site-directed mutagenesis.**

1363

| Primer              | Sequence                            | For     | Insert | Vector                | RE      |
|---------------------|-------------------------------------|---------|--------|-----------------------|---------|
| NA E229A_fw         | GAGGACACAAGAGTCTGCATGTGCCTGTGTAAATG | SDM     | NA     | -                     | -       |
| NA E229A_rv         | CATTTACACAGGCACATGCAGACTCTTGTGTCCTC | SDM     | NA     | -                     | -       |
| NA_Fw_HindIII       | GCGCAAGCTTATGAATCCAACCAAAAGAT       | Cloning | NA     | to pEGFP-N1           | HindIII |
| NA_Rv_KpnI_pEGFP-N1 | GCGCGGTACCGTCTTGTCAATGGTAAATGGC     | Cloning | NA     | to pEGFP-N1           | KpnI    |
| PR8_NA_NotI_fw      | GCGCGCGCGGCCGCATGAATCCAATCAGAAA     | Cloning | NA     | from pEGFP-N1 to pLEX | NotI    |
| GFP_XhoI_rv         | TCAGCTCGAGTTACTTGTACAGCTCGTCCATGC   | Cloning | GFP    | from pEGFP-N1 to pLEX | XhoI    |

1364

1365

1366

1367

1368

1369

1370
